# Supplementary material for: Genome-wide identification of long non-coding RNAs in tomato plants irradiated by neutrons followed by infection with Tomato yellow leaf curl virus
Source: PeerJ. 2019 Jan 28;7:e6286. doi: 10.7717/peerj.6286 (PMC6354667; doi:10.7717/peerj.6286)
Supplement: Table S3 [file peerj-07-6286-s003.xlsx]

## Sheet: Table S3
Table S3. List of tomato lncRNAs associated with mRNAs and their respective functions.
LncRNA	Corresponding tomato gene	Functions of tomato gene	Corresponding Arabidopsis gene
TCONS_00000267	Solyc00g023600.1	Unknown Protein	No hits
TCONS_00000295	Solyc00g075450.2	Unknown Protein	No hits
TCONS_00000298	Solyc00g082550.1	Kinesin light chain IPR011990 Tetratricopeptide-like helical	AT4G10840
TCONS_00000316	Solyc00g127660.2	Ribonucleoside-diphosphate reductase IPR000788 Ribonucleotide reductase large subunit, C-terminal	AT2G21790
TCONS_00000144	Solyc00g160780.2	cDNA clone J033046E14 full insert sequence	AT1G76940
TCONS_00002872	Solyc01g005110.2	Prolyl 3-hydroxylase 1 IPR006620 Prolyl 4-hydroxylase, alpha subunit	AT1G68080
TCONS_00000395	Solyc01g005330.2	Conserved membrane protein IPR010721 Protein of unknown function DUF1295	AT2G46890
TCONS_00000414	Solyc01g005530.2	Tetratricopeptide TPR_2 repeat protein IPR001478 PDZ_DHR_GLGF	AT1G55480
TCONS_00000419	Solyc01g005590.2	Unknown Protein IPR012438 Protein of unknown function DUF1639	AT1G55340
TCONS_00000419	Solyc01g005590.2	Unknown Protein IPR012438 Protein of unknown function DUF1639	AT1G55340
TCONS_00002926	Solyc01g005820.2	Mak16 protein IPR006958 Mak16 protein	AT1G23280
TCONS_00000531	Solyc01g007060.2	U-box domain-containing protein 24 IPR003613 U box domain	AT3G11840
TCONS_00003023	Solyc01g007140.2	Receptor like kinase, RLK	AT2G01820
TCONS_00003085	Solyc01g008270.2	E2F-associated phosphoprotein IPR019370 E2F-associated phosphoprotein, C-terminal	AT5G08320
TCONS_00003105	Solyc01g008520.2	Photosystem II 5 kDa protein, chloroplastic	AT1G51400
TCONS_00000656	Solyc01g009090.2	FHA domain containing protein IPR000253 Forkhead-associated	AT2G21530
TCONS_00003160	Solyc01g009380.2	Cytochrome P450	AT2G40890
TCONS_00000693	Solyc01g009750.2	Unknown Protein IPR010399 Tify	AT5G13220
TCONS_00003192	Solyc01g010130.2	Unknown Protein	No hits
TCONS_00000719	Solyc01g010270.2	Cytochrome P450	AT5G06900
TCONS_00003216	Solyc01g010590.2	Ribosomal protein IPR002942 RNA-binding S4 IPR018079 Ribosomal protein S4, conserved site IPR001912 Ribosomal protein S4	AT5G39850
TCONS_00000778	Solyc01g014200.1	Unknown Protein	No hits
TCONS_00000778	Solyc01g014200.1	Unknown Protein	No hits
TCONS_00000781	Solyc01g014270.2	Unknown Protein	No hits
TCONS_00000781	Solyc01g014270.2	Unknown Protein	No hits
TCONS_00000781	Solyc01g014270.2	Unknown Protein	No hits
TCONS_00000791	Solyc01g015050.1	Unknown Protein	No hits
TCONS_00000794	Solyc01g015240.1	Unknown Protein	No hits
TCONS_00003294	Solyc01g019100.1	Unknown Protein	No hits
TCONS_00000834	Solyc01g028930.2	Unknown Protein	No hits
TCONS_00000862	Solyc01g056350.1	DET1-like protein IPR019138 De-etiolated protein 1, Det1	AT4G10180
TCONS_00000862	Solyc01g056350.1	DET1-like protein IPR019138 De-etiolated protein 1, Det1	AT4G10180
TCONS_00003355	Solyc01g056520.2	HAT family dimerisation domain containing protein IPR008906 HAT dimerisation	AT3G42170
TCONS_00000878	Solyc01g056980.2	Unknown Protein	No hits
TCONS_00000878	Solyc01g056980.2	Unknown Protein	No hits
TCONS_00000878	Solyc01g056980.2	Unknown Protein	No hits
TCONS_00000878	Solyc01g056980.2	Unknown Protein	No hits
TCONS_00003375	Solyc01g057210.2	Pentatricopeptide repeat-containing protein IPR002885 Pentatricopeptide repeat	AT3G06430
TCONS_00003378	Solyc01g057340.2	Yellow stripe-like protein 1.3 (Fragment) IPR004813 Oligopeptide transporter OPT superfamily	AT5G24380
TCONS_00003378	Solyc01g057340.2	Yellow stripe-like protein 1.3 (Fragment) IPR004813 Oligopeptide transporter OPT superfamily	AT5G24380
TCONS_00000898	Solyc01g057730.1	Helitron helicase-like protein	No hits
TCONS_00000910	Solyc01g058100.2	Unknown Protein	No hits
TCONS_00000910	Solyc01g058100.2	Unknown Protein	No hits
TCONS_00000948	Solyc01g060140.2	ADP-ribosylation factor-like protein 3 IPR006687 GTP-binding protein SAR1	AT3G62560
TCONS_00003437	Solyc01g060240.2	Unknown Protein	No hits
TCONS_00000987	Solyc01g066630.1	Fatty acid oxidation complex subunit alpha IPR006176 3-hydroxyacyl-CoA dehydrogenase, NAD binding	AT3G06860
TCONS_00000987	Solyc01g066630.1	Fatty acid oxidation complex subunit alpha IPR006176 3-hydroxyacyl-CoA dehydrogenase, NAD binding	AT3G06860
TCONS_00000996	Solyc01g066830.2	Kinesin like protein IPR001752 Kinesin, motor region	AT3G16630
TCONS_00001033	Solyc01g067490.2	Kelch-domain-containing protein IPR015915 Kelch-type beta propeller	AT5G18590
TCONS_00001042	Solyc01g067580.2	Unknown Protein	No hits
TCONS_00001053	Solyc01g067690.2	Tubby-like F-box protein 6 IPR000007 Tubby, C-terminal	AT2G47900
TCONS_00001070	Solyc01g068030.2	Cyclase_dehydrase IPR005031 Streptomyces cyclase_dehydrase	AT1G02475
TCONS_00001332	Solyc01g073960.2	Bromodomain protein IPR001487 Bromodomain	AT2G44430
TCONS_00003610	Solyc01g079430.2	Cytochrome c oxidase subunit VC family protein IPR008432 Cytochrome c oxidase subunit Vc	AT5G61310
TCONS_00003684	Solyc01g080370.2	MHD domain-containing death-inducing protein IPR008968 Clathrin adaptor, mu subunit, C-terminal	AT2G20790
TCONS_00001268	Solyc01g081150.2	Phototropic-responsive NPH3 family protein IPR004249 NPH3	AT5G17580
TCONS_00001283	Solyc01g081450.2	Unknown Protein IPR010410 Protein of unknown function DUF1005	AT5G17640
TCONS_00001283	Solyc01g081450.2	Unknown Protein IPR010410 Protein of unknown function DUF1005	AT5G17640
TCONS_00003818	Solyc01g086860.2	Ras-related protein Rab-25 IPR015595 Rab11-related	AT5G47960
TCONS_00001380	Solyc01g087320.2	Histone-lysine N-methyltransferase MLL IPR011011 Zinc finger, FYVE_PHD-type	AT3G08020
TCONS_00001385	Solyc01g087430.2	PHD zinc finger-containing protein IPR011011 Zinc finger, FYVE_PHD-type	AT3G08020
TCONS_00003913	Solyc01g088100.2	Hydrolase alpha_beta fold family protein IPR000073 Alpha_beta hydrolase fold-1	AT5G13800
TCONS_00001475	Solyc01g088770.2	Cytochrome P450	AT5G24910
TCONS_00001488	Solyc01g089980.2	Nucleoside diphosphate kinase IPR001564 Nucleoside diphosphate kinase, core	AT4G09320
TCONS_00003968	Solyc01g090170.2	Unknown Protein	No hits
TCONS_00004007	Solyc01g090720.2	Malate dehydrogenase, cytoplasmic IPR011274 Malate dehydrogenase, NAD-dependent, cytosolic	AT5G43330
TCONS_00001541	Solyc01g090860.2	Unknown Protein IPR003604 Zinc finger, U1-type	No hits
TCONS_00001548	Solyc01g090990.2	Unknown Protein	AT2G35736
TCONS_00004026	Solyc01g091040.2	Auxin-responsive family protein IPR003676 Auxin responsive SAUR protein	AT3G60690
TCONS_00004032	Solyc01g091160.2	Golgi SNAP receptor complex member 1 IPR007705 Vesicle transport v-SNARE	AT2G45200
TCONS_00001597	Solyc01g091800.2	Unknown Protein	AT1G01840
TCONS_00004123	Solyc01g094350.2	Acetyl-coenzyme A carboxylase carboxyl transferase subunit alpha IPR001095 Acetyl-CoA carboxylase, alpha subunit	AT2G38040
TCONS_00004127	Solyc01g094420.2	Phosphoribosylanthranilate transferase (Fragment) IPR013583 Phosphoribosyltransferase C-terminal, plant	AT4G11610
TCONS_00004148	Solyc01g094680.2	Aberrant root formation protein 4	AT5G11030
TCONS_00001680	Solyc01g094840.2	Receptor-like protein kinase IPR002528 Multi antimicrobial extrusion protein MatE	AT4G00340
TCONS_00001712	Solyc01g095220.2	Golgin candidate 4	AT2G46180
TCONS_00001712	Solyc01g095220.2	Golgin candidate 4	AT2G46180
TCONS_00004234	Solyc01g095730.2	Lipase IPR002921 Lipase, class 3	AT3G61680
TCONS_00001829	Solyc01g096850.2	Os02g0794300 protein (Fragment) IPR007573 Protein of unknown function DUF566	AT2G44190
TCONS_00001836	Solyc01g096910.2	DNA gyrase subunit A family protein IPR005743 DNA gyrase, subunit A	AT3G10690
TCONS_00004340	Solyc01g097010.2	Beta-D-glucosidase IPR001764 Glycoside hydrolase, family 3, N-terminal	AT5G04885
TCONS_00001846	Solyc01g097020.2	Nucleic acid binding protein IPR018111 K Homology, type 1, subgroup	AT3G04610
TCONS_00004377	Solyc01g097560.1	Annexin 11 IPR015472 Annexin like protein IPR001464 Annexin	AT2G38750
TCONS_00004383	Solyc01g097640.2	BAC19.2	AT5G49610
TCONS_00004395	Solyc01g097870.2	Membrane protein IPR010903 Protein of unknown function DUF1517	AT1G54520
TCONS_00004406	Solyc01g098060.1	MADS-box transcription factor 56 IPR002100 Transcription factor, MADS-box	AT1G65360
TCONS_00004410	Solyc01g098090.2	BY-inesin-like protein 5 IPR001752 Kinesin, motor region	AT5G27950
TCONS_00001926	Solyc01g098180.2	Exportin 5 (Fragment) IPR013598 Exportin-1_Importin-beta-like	AT3G05040
TCONS_00001932	Solyc01g098280.2	Unknown Protein	No hits
TCONS_00001935	Solyc01g098350.2	DNAJ heat shock N-terminal domain-containing protein (Fragment) IPR015609 Molecular chaperone, heat shock protein, Hsp40, DnaJ	AT5G27240
TCONS_00001936	Solyc01g098380.2	LRR receptor-like serine_threonine-protein kinase, RLP	AT1G45616
TCONS_00001942	Solyc01g098440.1	Breast carcinoma amplified sequence 3 (Fragment) IPR011046 WD40 repeat-like	AT1G54710
TCONS_00001961	Solyc01g098630.2	Unknown Protein	No hits
TCONS_00004471	Solyc01g098920.2	Mitochondrial carrier protein IPR001993 Mitochondrial substrate carrier	AT3G05290
TCONS_00002008	Solyc01g099290.2	5_apos-AMP-activated protein kinase gamma-1 subunit IPR000644 Cystathionine beta-synthase, core	AT1G09020
TCONS_00002043	Solyc01g099800.2	AT3G05545 protein (Fragment) IPR018957 Zinc finger, C3HC4 RING-type	AT3G05545
TCONS_00002054	Solyc01g099930.2	Photoassimilate-responsive protein PAR-1b-like protein IPR009489 PAR1	AT3G54040
TCONS_00004545	Solyc01g100080.2	Unknown Protein	AT5G27020
TCONS_00004569	Solyc01g100410.2	Pseudouridine synthase family protein IPR006145 Pseudouridine synthase, RsuA and RluB_C_D_E_F	AT1G56345
TCONS_00002134	Solyc01g100990.2	Polygalacturonase IPR012334 Pectin lyase fold	AT1G02460
TCONS_00004711	Solyc01g103420.2	Nucleic acid binding protein IPR004087 K Homology	AT1G09660
TCONS_00002309	Solyc01g104160.2	Unknown Protein	No hits
TCONS_00002309	Solyc01g104160.2	Unknown Protein	No hits
TCONS_00004823	Solyc01g104650.2	Helicase	AT4G15570
TCONS_00002420	Solyc01g105720.2	Peptidyl-prolyl cis-trans isomerase IPR001179 Peptidyl-prolyl cis-trans isomerase, FKBP-type	AT5G64350
TCONS_00002431	Solyc01g105980.2	Magnesium-dependent phosphatase-1 family protein expressed IPR010036 Magnesium-dependent phosphatase-1	AT2G14110
TCONS_00002447	Solyc01g106170.2	Receptor protein kinase-like protein IPR002290 Serine_threonine protein kinase	AT5G10530
TCONS_00004931	Solyc01g106290.2	DNA-binding bromodomain-containing protein IPR001487 Bromodomain	AT5G65630
TCONS_00004932	Solyc01g106310.2	Unknown Protein	AT2G32190
TCONS_00005010	Solyc01g107510.2	Unknown Protein	No hits
TCONS_00002567	Solyc01g108000.2	MAPprotein kinase-like protein IPR017946 PLC-like phosphodiesterase, TIM beta_alpha-barrel domain	AT1G49740
TCONS_00002620	Solyc01g108690.1	Hydrolase alpha_beta fold family protein IPR000073 Alpha_beta hydrolase fold-1	AT2G23610
TCONS_00002782	Solyc01g111440.2	Pentatricopeptide repeat-containing protein IPR002885 Pentatricopeptide repeat	AT3G03580
TCONS_00005275	Solyc01g111560.2	Protein MCM10 homolog IPR015408 Zinc finger, Mcm10_DnaG-type	AT2G20980
TCONS_00005299	Solyc01g111780.2	Os11g0198100 protein (Fragment) IPR006852 Protein of unknown function DUF616	AT4G38500
TCONS_00007480	Solyc02g012000.1	Photosystem Q(B) protein IPR000484 Photosynthetic reaction centre, L_M	ATCG00020
TCONS_00007483	Solyc02g014040.1	Pto-like, Serine_threonine kinase protein, resistance protein	AT5G39000
TCONS_00005414	Solyc02g014840.2	Serine carboxypeptidase IPR001563 Peptidase S10, serine carboxypeptidase	AT5G23210
TCONS_00005419	Solyc02g020890.2	Unknown Protein	No hits
TCONS_00005425	Solyc02g021020.2	Unknown Protein	No hits
TCONS_00005437	Solyc02g021360.2	Testis-specific Y-encoded protein	AT1G74560
TCONS_00007538	Solyc02g022830.2	Unknown Protein	No hits
TCONS_00007581	Solyc02g031980.2	50S ribosomal protein L12-2 IPR015608 Ribosomal protein L12, chloroplast	AT1G70190
TCONS_00007632	Solyc02g037590.1	Mutator-like transposase IPR001878 Zinc finger, CCHC-type	No hits
TCONS_00005553	Solyc02g038750.2	3-hydroxy-3-methylglutaryl coenzyme A reductase IPR004554 Hydroxymethylglutaryl-CoA reductase, class I, catalytic	AT1G76490
TCONS_00005567	Solyc02g062100.2	Unknown Protein	No hits
TCONS_00007669	Solyc02g062300.2	Polyadenylate-binding protein IPR000504 RNA recognition motif, RNP-1	AT2G44710
TCONS_00005580	Solyc02g062360.2	Heat shock protein DnaJ domain protein	AT3G51140
TCONS_00005580	Solyc02g062360.2	Heat shock protein DnaJ domain protein	AT3G51140
TCONS_00007676	Solyc02g062390.2	GATA transcription factor 9 IPR000679 Zinc finger, GATA-type	AT5G66320
TCONS_00005642	Solyc02g063440.2	BHLH transcription factor IPR011598 Helix-loop-helix DNA-binding	AT5G65640
TCONS_00007830	Solyc02g066830.2	Unknown Protein	No hits
TCONS_00005741	Solyc02g067210.2	Pentatricopeptide repeat-containing protein IPR002885 Pentatricopeptide repeat	AT5G15280
TCONS_00005751	Solyc02g067370.2	Protease Do-like (S2 serine-type protease) IPR001254 Peptidase S1 and S6, chymotrypsin_Hap	AT5G39830
TCONS_00005791	Solyc02g067990.2	Serine_threonine-protein phosphatase 2A regulatory subunit delta 1 isoform IPR002554 Protein phosphatase 2A, regulatory B subunit, B56	AT1G13460
TCONS_00005795	Solyc02g068000.2	Genomic DNA chromosome 5 P1 clone MNF13	AT5G40740
TCONS_00005814	Solyc02g068230.2	C-glucosyltransferase IPR002213 UDP-glucuronosyl_UDP-glucosyltransferase	AT2G30140
TCONS_00005919	Solyc02g069640.2	Subtilisin-like serine protease IPR015500 Peptidase S8, subtilisin-related	AT4G20430
TCONS_00008047	Solyc02g069720.2	Sodium_calcium exchanger protein IPR004837 Sodium_calcium exchanger membrane region	AT1G54115
TCONS_00008067	Solyc02g069950.2	WPP domain-associated protein (Fragment)	AT2G34730
TCONS_00005947	Solyc02g069970.2	NAC domain protein IPR003441 protein	AT2G43000
TCONS_00005949	Solyc02g069990.1	PHD and RING finger domain-containing protein 1 IPR019787 Zinc finger, PHD-finger	AT2G19260
TCONS_00008113	Solyc02g070630.2	F-box family protein IPR001810 Cyclin-like F-box	AT3G23880
TCONS_00008146	Solyc02g071170.2	Os10g0578600 protein (Fragment)	AT1G29790
TCONS_00008148	Solyc02g071190.2	TA9 protein (Fragment) IPR009719 Protein of unknown function DUF1296	AT1G29370
TCONS_00006034	Solyc02g071240.2	Pre-mRNA-processing factor 39 IPR003107 RNA-processing protein, HAT helix	AT5G46400
TCONS_00008153	Solyc02g071250.2	Genomic DNA chromosome 5 P1 clone MPL12	No hits
TCONS_00006089	Solyc02g072100.2	DNA polymerase III subunit gamma_tau IPR012763 DNA polymerase III, subunit gamma_ tau	AT4G18820
TCONS_00006114	Solyc02g072510.2	Nucleobase ascorbate transporter IPR006043 Xanthine_uracil_vitamin C permease	AT2G34190
TCONS_00008254	Solyc02g076840.2	S-locus-specific glycoprotein (Fragment) lectin	AT1G78830
TCONS_00008299	Solyc02g077730.2	Unknown Protein	No hits
TCONS_00006313	Solyc02g079330.2	Unknown Protein	No hits
TCONS_00008453	Solyc02g079730.2	Centrin IPR011992 EF-Hand type	AT5G54490
TCONS_00006391	Solyc02g080500.2	MATE efflux family protein expressed IPR002528 Multi antimicrobial extrusion protein MatE	AT3G21690
TCONS_00006404	Solyc02g080770.2	Glycine-rich protein	No hits
TCONS_00006477	Solyc02g082020.2	Mitochondrial transcription termination factor family protein IPR003690 Mitochodrial transcription termination factor-related	AT5G07900
TCONS_00006606	Solyc02g083580.2	Ubiquitin-conjugating enzyme E2 10 IPR000608 Ubiquitin-conjugating enzyme, E2	AT5G53300
TCONS_00006635	Solyc02g084020.2	Auxin-induced SAUR-like protein IPR003676 Auxin responsive SAUR protein	AT4G34760
TCONS_00006693	Solyc02g084850.2	Dehydrin DHN1 IPR000167 Dehydrin	AT3G50980
TCONS_00008894	Solyc02g086230.1	Abhydrolase domain-containing protein FAM108B1	AT5G38220
TCONS_00008910	Solyc02g086460.2	Genomic DNA chromosome 5 TAC clone K21I16	AT5G40460
TCONS_00006817	Solyc02g086660.2	Glucose-6-phosphate_phosphate translocator 2 IPR004696 Tpt phosphate_phosphoenolpyruvate translocator	AT3G01550
TCONS_00006866	Solyc02g087230.2	Protein bicaudal C homolog 1-B IPR001660 Sterile alpha motif SAM	AT1G70180
TCONS_00008982	Solyc02g087310.2	Protein transport SEC13-like protein IPR020472 G-protein beta WD-40 repeat, region	AT2G30050
TCONS_00009018	Solyc02g087940.2	60S ribosomal protein L34 IPR008195 Ribosomal protein L34e	AT1G26880
TCONS_00009093	Solyc02g088930.2	Ras GTPase-activating protein-binding protein 2 IPR018222 Nuclear transport factor 2, Eukaryote	AT5G60980
TCONS_00007032	Solyc02g089490.2	Unknown Protein	AT4G25760
TCONS_00007032	Solyc02g089490.2	Unknown Protein	AT4G25760
TCONS_00007054	Solyc02g089810.2	Nuclear matrix constituent protein 1-like	AT1G67230
TCONS_00007130	Solyc02g090860.2	Splicing factor arginine_serine-rich 16 IPR019147 Splicing factor, suppressor of white apricot	AT4G36980
TCONS_00007144	Solyc02g091040.2	Nuclear transcription factor Y subunit C-2 IPR003958 Transcription factor CBF_NF-Y_archaeal histone	AT5G63470
TCONS_00007144	Solyc02g091040.2	Nuclear transcription factor Y subunit C-2 IPR003958 Transcription factor CBF_NF-Y_archaeal histone	AT5G63470
TCONS_00009271	Solyc02g091290.2	ATP-dependent Clp protease proteolytic subunit IPR001907 Peptidase S14, ClpP	AT1G66670
TCONS_00009341	Solyc02g092240.2	Adiponectin receptor 2 IPR004254 Hly-III related	AT4G37680
TCONS_00007368	Solyc02g093810.2	Serine_threonine-protein phosphatase 2A regulatory subunit delta 1 isoform IPR002554 Protein phosphatase 2A, regulatory B subunit, B56	AT1G13460
TCONS_00007381	Solyc02g093900.2	Unknown Protein	AT3G27250
TCONS_00009488	Solyc02g094000.1	Adenylate kinase family-like protein IPR000850 Adenylate kinase	AT3G01820
TCONS_00009506	Solyc02g094250.2	Unknown Protein	No hits
TCONS_00007415	Solyc02g094350.2	GAI-like protein 1 (Fragment) IPR005202 GRAS transcription factor	AT1G66350
TCONS_00009538	Solyc03g005010.2	Peptidase M48 Ste24p IPR001915 Peptidase M48, Ste24p	AT3G27110
TCONS_00011687	Solyc03g006310.2	Receptor like kinase, RLK	AT1G28440
TCONS_00009628	Solyc03g006340.2	LRR receptor-like serine_threonine-protein kinase, RLP	AT1G28340
TCONS_00009628	Solyc03g006340.2	LRR receptor-like serine_threonine-protein kinase, RLP	AT1G28340
TCONS_00009634	Solyc03g006420.2	Plant-specific domain TIGR01615 family protein IPR006502 Protein of unknown function DUF506, plant	AT4G32480
TCONS_00011769	Solyc03g007480.2	Ubiquitin-conjugating enzyme E2 10 IPR000608 Ubiquitin-conjugating enzyme, E2	AT5G53300
TCONS_00009761	Solyc03g025260.1	Multidrug resistance protein mdtK IPR002528 Multi antimicrobial extrusion protein MatE	AT4G25640
TCONS_00011813	Solyc03g025280.2	rRNA 2_apos-O-methyltransferase fibrillarin IPR000692 Fibrillarin	AT4G25630
TCONS_00011831	Solyc03g025480.2	Kinesin-like protein IPR001752 Kinesin, motor region	AT5G23910
TCONS_00011856	Solyc03g025900.2	DNA mismatch repair protein mutS IPR000432 DNA mismatch repair protein MutS, C-terminal	AT4G25540
TCONS_00009930	Solyc03g033420.2	Ubiquitin-conjugating enzyme E2 10 IPR000608 Ubiquitin-conjugating enzyme, E2	AT5G53300
TCONS_00012049	Solyc03g044140.2	Aromatic L-amino acid decarboxylase IPR010977 Aromatic-L-amino-acid decarboxylase	AT2G20340
TCONS_00010022	Solyc03g044370.2	Mutator-like transposase 53847-56139 IPR004332 Transposase, MuDR, plant	No hits
TCONS_00010131	Solyc03g059090.1	Receptor-like kinase IPR002290 Serine_threonine protein kinase	AT2G41970
TCONS_00010143	Solyc03g059320.1	WD-40 repeat family protein IPR020472 G-protein beta WD-40 repeat, region	AT3G18140
TCONS_00012181	Solyc03g059420.2	Unknown Protein	No hits
TCONS_00012182	Solyc03g059480.1	F1C9.9 protein	AT5G39200
TCONS_00012182	Solyc03g059480.1	F1C9.9 protein	AT5G39200
TCONS_00010165	Solyc03g062730.2	Galactose mutarotase-like IPR011013 Glycoside hydrolase-type carbohydrate-binding	AT1G64770
TCONS_00010165	Solyc03g062730.2	Galactose mutarotase-like IPR011013 Glycoside hydrolase-type carbohydrate-binding	AT1G64770
TCONS_00010165	Solyc03g062730.2	Galactose mutarotase-like IPR011013 Glycoside hydrolase-type carbohydrate-binding	AT1G64770
TCONS_00010165	Solyc03g062730.2	Galactose mutarotase-like IPR011013 Glycoside hydrolase-type carbohydrate-binding	AT1G64770
TCONS_00010196	Solyc03g063630.2	Guanylate kinase IPR017665 Guanylate kinase, sub-group	AT3G57550
TCONS_00010207	Solyc03g063970.2	Mutator-like transposase-like IPR004332 Transposase, MuDR, plant	No hits
TCONS_00010075	Solyc03g070430.1	Unknown Protein	No hits
TCONS_00010080	Solyc03g071590.2	Gag-pol polyprotein (Fragment)	AT4G23160
TCONS_00010083	Solyc03g071650.1	Splicing factor-like protein	AT5G09880
TCONS_00012267	Solyc03g078220.1	Unknown Protein	No hits
TCONS_00012276	Solyc03g078390.2	Glutaredoxin family protein IPR012335 Thioredoxin fold	AT5G13810
TCONS_00012299	Solyc03g079920.2	Zinc ion binding protein IPR001781 Zinc finger, LIM-type	AT2G39830
TCONS_00012364	Solyc03g082800.1	Extensin-like protein Dif54	AT3G12440
TCONS_00012396	Solyc03g083210.2	Unknown Protein	AT5G24280
TCONS_00012423	Solyc03g083610.2	Unknown Protein	No hits
TCONS_00010402	Solyc03g083680.1	Unknown Protein	No hits
TCONS_00010427	Solyc03g093340.2	Receptor like kinase, RLK	AT5G61480
TCONS_00010459	Solyc03g094080.2	Mediator of RNA polymerase II transcription subunit 31	AT5G19910
TCONS_00012505	Solyc03g095410.2	Mutator-like transposase IPR018289 MULE transposase, conserved domain	AT1G64260
TCONS_00010494	Solyc03g095730.2	Transcription elongation factor A protein 2 IPR006289 Transcription elongation factor, TFIIS	AT2G38560
TCONS_00010503	Solyc03g096000.2	Unknown Protein	AT3G56010
TCONS_00010505	Solyc03g096060.1	1-aminocyclopropane-1-carboxylate oxidase 1 IPR005123 Oxoglutarate and iron-dependent oxygenase	AT5G05600
TCONS_00012574	Solyc03g096960.2	D-xylose transporter IPR003663 Sugar_inositol transporter	AT5G17010
TCONS_00010563	Solyc03g097240.2	Protein containing AIG2-like domain IPR013024 Butirosin biosynthesis, BtrG-like	AT3G02910
TCONS_00010613	Solyc03g097900.2	Unknown Protein	No hits
TCONS_00012658	Solyc03g097970.2	CHP-rich zinc finger protein-like IPR011424 C1-like	AT2G27660
TCONS_00010656	Solyc03g098470.2	Retinol dehydrogenase 12 IPR002347 Glucose_ribitol dehydrogenase	AT4G27760
TCONS_00012697	Solyc03g098620.2	Genomic DNA chromosome 3 P1 clone MVI11	AT3G19180
TCONS_00010666	Solyc03g098690.1	Kunitz trypsin inhibitor IPR011065 Kunitz inhibitor ST1-like	AT1G73325
TCONS_00010666	Solyc03g098690.1	Kunitz trypsin inhibitor IPR011065 Kunitz inhibitor ST1-like	AT1G73325
TCONS_00012769	Solyc03g111250.2	Unknown Protein	No hits
TCONS_00010745	Solyc03g111370.2	Oxygen-independent coproporphyrinogen III oxidase-like protein sll1917 IPR004559 Putative oxygen-independent coproporphyrinogen III oxidase	AT5G63290
TCONS_00012802	Solyc03g111760.2	Genomic DNA chromosome 5 TAC clone K6A12 IPR019782 WD40 repeat 2	AT5G50230
TCONS_00012802	Solyc03g111760.2	Genomic DNA chromosome 5 TAC clone K6A12 IPR019782 WD40 repeat 2	AT5G50230
TCONS_00012851	Solyc03g112570.2	Pentatricopeptide repeat-containing protein IPR002885 Pentatricopeptide repeat	AT1G80550
TCONS_00013063	Solyc03g115630.2	Unknown Protein IPR008545 Protein of unknown function DUF827, plant	AT1G12150
TCONS_00013068	Solyc03g115660.2	Eukaryotic translation initiation factor 5A IPR001884 Translation elongation factor, IF5A	AT1G13950
TCONS_00011087	Solyc03g116180.1	Nucleosome assembly protein family	AT1G18800
TCONS_00011087	Solyc03g116180.1	Nucleosome assembly protein family	AT1G18800
TCONS_00011108	Solyc03g116550.2	Pentatricopeptide repeat-containing protein IPR002885 Pentatricopeptide repeat	AT1G52640
TCONS_00013125	Solyc03g116560.1	AT1G52630-like protein (Fragment) IPR004348 Protein of unknown function DUF246, plant	AT1G52630
TCONS_00013125	Solyc03g116560.1	AT1G52630-like protein (Fragment) IPR004348 Protein of unknown function DUF246, plant	AT1G52630
TCONS_00013223	Solyc03g117900.2	Unknown protein DS12 from 2D-PAGE of leaf, chloroplastic	AT1G16880
TCONS_00013226	Solyc03g117940.2	FRIGIDA IPR012474 Frigida-like	AT4G00650
TCONS_00013236	Solyc03g118090.2	Pentatricopeptide repeat-containing protein IPR002885 Pentatricopeptide repeat	AT5G61800
TCONS_00011267	Solyc03g118650.2	D-tagatose-1,6-bisphosphate aldolase subunit gatY IPR015815 3-hydroxyacid dehydrogenase_reductase	AT1G18270
TCONS_00013289	Solyc03g118880.2	Octicosapeptide_Phox_Bem1p domain-containing protein IPR000270 Octicosapeptide_Phox_Bem1p	AT2G01190
TCONS_00013328	Solyc03g119420.2	Unknown Protein IPR008889 VQ	AT3G18360
TCONS_00013354	Solyc03g119790.2	Transcription initiation factor TFIID subunit IPR014782 Peptidase M1, membrane alanine aminopeptidase, N-terminal	AT1G73960
TCONS_00011395	Solyc03g120200.1	Plant-specific domain TIGR01568 family protein IPR006458 Protein of unknown function DUF623, plant	AT1G79960
TCONS_00013382	Solyc03g120250.2	SYS1 homolog IPR019185 Integral membrane protein SYS1-related	AT1G79990
TCONS_00011464	Solyc03g121210.2	Unknown Protein	No hits
TCONS_00011466	Solyc03g121250.2	BHLH transcription factor-like IPR001092 Basic helix-loop-helix dimerisation region bHLH	AT3G21330
TCONS_00011479	Solyc03g121410.2	Dof zinc finger protein 4 IPR003851 Zinc finger, Dof-type	AT1G51700
TCONS_00013484	Solyc03g121530.2	Unknown Protein	AT1G55160
TCONS_00011503	Solyc03g121700.2	RING finger protein 13 IPR018957 Zinc finger, C3HC4 RING-type	AT3G15740
TCONS_00013504	Solyc03g121860.1	Aleurone layer morphogenesis protein	AT1G05950
TCONS_00013520	Solyc03g122000.2	MYB transcription factor-like IPR001005 SANT, DNA-binding	AT1G72650
TCONS_00011541	Solyc03g122260.2	Transmembrane protein IPR009637 Transmembrane receptor, eukaryota	AT1G72480
TCONS_00013621	Solyc04g005330.2	MADS-box transcription factor IPR002100 Transcription factor, MADS-box	AT3G02310
TCONS_00015305	Solyc04g006950.2	Phospholipid-transporting ATPase IPR006539 ATPase, P-type, phospholipid-translocating, flippase	AT1G68710
TCONS_00015350	Solyc04g007600.2	Nodulin-like protein IPR000620 Protein of unknown function DUF6, transmembrane	AT3G30340
TCONS_00013748	Solyc04g008010.2	Calmodulin	AT1G24620
TCONS_00013757	Solyc04g008200.2	Nbs-lrr, resistance protein	AT3G46730
TCONS_00015434	Solyc04g008720.2	Unknown Protein	AT3G24506
TCONS_00013857	Solyc04g009570.2	TBC1 domain family member 8B IPR000195 RabGAP_TBC	AT3G55020
TCONS_00013880	Solyc04g009870.1	1-aminocyclopropane-1-carboxylate oxidase-like protein IPR005123 Oxoglutarate and iron-dependent oxygenase	AT1G06620
TCONS_00015519	Solyc04g010000.2	Lysine-specific demethylase 5A IPR013129 Transcription factor jumonji	AT1G08620
TCONS_00015520	Solyc04g010020.2	Thioredoxin-like protein 1 IPR015467 Thioredoxin, core	AT3G04780
TCONS_00015523	Solyc04g010070.2	Pentatricopeptide repeat-containing protein IPR002885 Pentatricopeptide repeat	AT3G04760
TCONS_00015555	Solyc04g011540.2	Os04g0129600 protein (Fragment)	AT2G20390
TCONS_00013937	Solyc04g011620.2	RING finger protein 13 IPR010543 Protein of unknown function DUF1117	AT5G59550
TCONS_00015643	Solyc04g015180.2	Nuclear inhibitor of protein phosphatase 1 IPR000253 Forkhead-associated	AT5G47790
TCONS_00015684	Solyc04g015950.1	Ribosomal RNA-processing protein IPR016024 Armadillo-type fold	AT4G23540
TCONS_00014099	Solyc04g016380.2	DNA ATP-dependent helicase IPR000330 SNF2-related	AT3G57300
TCONS_00014120	Solyc04g018080.2	Transcription factor APFI-like	AT1G19580
TCONS_00014120	Solyc04g018080.2	Transcription factor APFI-like	AT1G19580
TCONS_00015768	Solyc04g026120.1	Cc-nbs, resistance protein fragment	AT3G46530
TCONS_00014150	Solyc04g026200.2	Unknown Protein	No hits
TCONS_00015762	Solyc04g026330.1	Ycf2 IPR008543 Chloroplast Ycf2	ATCG01280
TCONS_00014148	Solyc04g026350.2	Diphosphate_fructose-6-phosphate 1-phosphotransferase IPR000023 Phosphofructokinase	AT4G04040
TCONS_00015748	Solyc04g040070.1	Mutator-like transposase-like IPR018289 MULE transposase, conserved domain	No hits
TCONS_00014217	Solyc04g047890.2	Unknown Protein	No hits
TCONS_00014217	Solyc04g047890.2	Unknown Protein	No hits
TCONS_00014258	Solyc04g050020.1	LOB domain protein 1 IPR004883 Lateral organ boundaries, LOB	AT1G07900
TCONS_00014258	Solyc04g050020.1	LOB domain protein 1 IPR004883 Lateral organ boundaries, LOB	AT1G07900
TCONS_00014283	Solyc04g050790.2	U-box domain-containing protein IPR011989 Armadillo-like helical	AT3G07360
TCONS_00014293	Solyc04g051150.2	Phospholipase D IPR015679 Phospholipase D	AT4G35790
TCONS_00014293	Solyc04g051150.2	Phospholipase D IPR015679 Phospholipase D	AT4G35790
TCONS_00014293	Solyc04g051150.2	Phospholipase D IPR015679 Phospholipase D	AT4G35790
TCONS_00014328	Solyc04g051830.2	Os03g0169900 protein (Fragment)	AT5G09960
TCONS_00014332	Solyc04g051860.2	Unknown Protein	AT1G56200
TCONS_00014339	Solyc04g054180.2	CPR5 (Fragment)	AT5G64930
TCONS_00015995	Solyc04g054780.2	Unknown Protein	No hits
TCONS_00015997	Solyc04g054820.2	Pollen allergen Phl p 11 IPR006041 Pollen Ole e 1 allergen and extensin	AT4G08685
TCONS_00014406	Solyc04g056600.2	Aspartyl protease family protein IPR001461 Peptidase A1	AT3G02740
TCONS_00014410	Solyc04g056650.2	LRR receptor-like serine_threonine-protein kinase, RLP	AT1G65380
TCONS_00014429	Solyc04g058010.2	Laccase IPR001117 Multicopper oxidase, type 1	AT5G09360
TCONS_00016076	Solyc04g063360.2	3-methyl-2-oxobutanoate dehydrogenase (2-methylpropanoyl-transferring) IPR001017 Dehydrogenase, E1 component	AT1G21400
TCONS_00014460	Solyc04g064520.2	Ras-related protein Rab-18 IPR015598 Rab18	AT1G43890
TCONS_00014460	Solyc04g064520.2	Ras-related protein Rab-18 IPR015598 Rab18	AT1G43890
TCONS_00014460	Solyc04g064520.2	Ras-related protein Rab-18 IPR015598 Rab18	AT1G43890
TCONS_00016112	Solyc04g064930.2	Pleckstrin homology domain containing family A member 8 IPR014830 Glycolipid transfer protein, GLTP	AT3G21260
TCONS_00016121	Solyc04g071090.2	Unknown Protein IPR006706 Extensin-like region	AT1G21310
TCONS_00014493	Solyc04g071100.1	Unknown Protein	No hits
TCONS_00016145	Solyc04g071450.2	Tubby-like F-box protein 8 IPR000007 Tubby, C-terminal	AT1G76900
TCONS_00014554	Solyc04g071970.2	2,5-dichloro-2,5-cyclohexadiene-1,4-diol dehydrogenase IPR002347 Glucose_ribitol dehydrogenase	AT1G52340
TCONS_00014576	Solyc04g072160.2	Pentatricopeptide repeat-containing protein-like protein IPR002885 Pentatricopeptide repeat	AT4G17616
TCONS_00014592	Solyc04g072450.2	MRNA complete cds clone RAFL23-27-B01	AT4G08540
TCONS_00014607	Solyc04g072640.2	Os10g0363700 protein (Fragment)	AT1G22060
TCONS_00016235	Solyc04g072880.2	Beta-D-xylosidase IPR001764 Glycoside hydrolase, family 3, N-terminal	AT1G78060
TCONS_00016275	Solyc04g074550.2	Alcohol dehydrogenase 1 IPR002085 Alcohol dehydrogenase superfamily, zinc-containing	AT1G22430
TCONS_00014706	Solyc04g076080.2	Pentatricopeptide repeat-containing protein IPR002885 Pentatricopeptide repeat	AT5G18475
TCONS_00016334	Solyc04g076340.2	Pentatricopeptide repeat-containing protein IPR002885 Pentatricopeptide repeat	AT2G29760
TCONS_00014741	Solyc04g076540.2	GATA transcription factor 25 IPR010402 CCT domain	AT3G21175
TCONS_00016351	Solyc04g076560.2	Genomic DNA chromosome 5 TAC clone K2I5	AT1G58250
TCONS_00016361	Solyc04g076710.2	MADS-box transcription factor-like protein IPR002487 Transcription factor, K-box	AT3G57230
TCONS_00016374	Solyc04g076850.2	Unknown Protein	No hits
TCONS_00014774	Solyc04g076940.2	Werner Syndrome-like exonuclease IPR012337 Polynucleotidyl transferase, ribonuclease H fold	AT3G12470
TCONS_00014774	Solyc04g076940.2	Werner Syndrome-like exonuclease IPR012337 Polynucleotidyl transferase, ribonuclease H fold	AT3G12470
TCONS_00014824	Solyc04g077560.2	Unknown Protein	No hits
TCONS_00016454	Solyc04g078130.2	Arginine N-methyltransferase 2 IPR002110 Ankyrin	AT5G65860
TCONS_00016544	Solyc04g079320.2	RNA Binding Protein 47 IPR012677 Nucleotide-binding, alpha-beta plait	AT1G47490
TCONS_00016666	Solyc04g080900.2	2-oxoglutarate and iron-dependent oxygenase domain-containing protein 2 IPR006620 Prolyl 4-hydroxylase, alpha subunit	AT3G18210
TCONS_00016684	Solyc04g081200.2	BZIP transcription factor family protein expressed IPR011616 bZIP transcription factor, bZIP-1	AT4G38900
TCONS_00016704	Solyc04g081410.2	Hexokinase 1 IPR001312 Hexokinase	AT1G47840
TCONS_00015136	Solyc04g081880.2	Expansin IPR002963 Expansin	AT1G20190
TCONS_00016793	Solyc04g082560.2	Trehalose-6-phosphate phosphatase IPR003337 Trehalose-phosphatase	AT1G78090
TCONS_00016805	Solyc04g082660.2	Palmitoyltransferase erf2 IPR001594 Zinc finger, DHHC-type	AT2G33640
TCONS_00015219	Solyc04g082790.2	Cinnamoyl CoA reductase-like 1-binding domain	AT2G33590
TCONS_00018192	Solyc05g005630.2	RNA-binding protein 25 IPR002483 Splicing factor PWI	AT1G60200
TCONS_00016922	Solyc05g006440.2	Formin 3 IPR015425 Actin-binding FH2	AT1G70140
TCONS_00016927	Solyc05g006490.2	Actin-related protein 2_3 complex subunit 1B IPR017383 Actin-related protein 2_3 complex, subunit 1	AT2G30910
TCONS_00018340	Solyc05g007970.2	Os01g0841200 protein (Fragment) IPR004348 Protein of unknown function DUF246, plant	AT2G01480
TCONS_00017169	Solyc05g009880.2	Baculoviral IAP repeat-containing 8 IPR019396 Transmembrane Fragile-X-F-associated protein	AT1G68820
TCONS_00017174	Solyc05g009980.2	Unknown Protein	AT2G32235
TCONS_00017177	Solyc05g010020.2	Plant-specific domain TIGR01570 family protein IPR006460 Protein of unknown function DUF617, plant	AT3G25640
TCONS_00018501	Solyc05g010280.2	Unknown Protein	AT5G38790
TCONS_00017237	Solyc05g012160.2	Ubiquinone biosynthesis protein COQ4, mitochondrial IPR007715 Coenzyme Q biosynthesis Coq4	AT2G03690
TCONS_00017389	Solyc05g014360.1	Serine_threonine-protein phosphatase 2A regulatory subunit delta 1 isoform IPR002554 Protein phosphatase 2A, regulatory B subunit, B56	AT1G13460
TCONS_00018729	Solyc05g015290.1	Unknown Protein	No hits
TCONS_00017425	Solyc05g015440.1	Unknown Protein	No hits
TCONS_00017425	Solyc05g015440.1	Unknown Protein	No hits
TCONS_00017439	Solyc05g015710.2	Os02g0508100 protein (Fragment)	AT3G48660
TCONS_00018777	Solyc05g016260.2	Cysteine-type peptidase IPR003323 Ovarian tumour, otubain	AT3G22260
TCONS_00018794	Solyc05g017980.2	Unknown Protein	No hits
TCONS_00017536	Solyc05g021520.1	Unknown Protein	No hits
TCONS_00017548	Solyc05g023830.1	SAM domain family protein IPR001660 Sterile alpha motif SAM	AT3G48800
TCONS_00017548	Solyc05g023830.1	SAM domain family protein IPR001660 Sterile alpha motif SAM	AT3G48800
TCONS_00018895	Solyc05g026050.2	Caffeoyl-CoA O-methyltransferase IPR002935 O-methyltransferase, family 3	AT1G67980
TCONS_00018896	Solyc05g026070.1	Glycine-rich protein	AT5G11700
TCONS_00017595	Solyc05g026500.1	Phosphoglucomutase_phosphomannomutase family protein IPR016055 Alpha-D-phosphohexomutase, alpha_beta_alpha I, II and III	AT1G70820
TCONS_00017595	Solyc05g026500.1	Phosphoglucomutase_phosphomannomutase family protein IPR016055 Alpha-D-phosphohexomutase, alpha_beta_alpha I, II and III	AT1G70820
TCONS_00017602	Solyc05g032830.1	Adenosylhomocysteinase IPR000043 S-adenosyl-L-homocysteine hydrolase	AT4G13940
TCONS_00017602	Solyc05g032830.1	Adenosylhomocysteinase IPR000043 S-adenosyl-L-homocysteine hydrolase	AT4G13940
TCONS_00017612	Solyc05g041130.1	Ubiquitin	No hits
TCONS_00017612	Solyc05g041130.1	Ubiquitin	No hits
TCONS_00018939	Solyc05g042030.2	Ripening-related protein 3	No hits
TCONS_00017639	Solyc05g043370.1	Laccase IPR017761 Laccase	AT3G09220
TCONS_00017639	Solyc05g043370.1	Laccase IPR017761 Laccase	AT3G09220
TCONS_00018961	Solyc05g044590.1	Unknown Protein	No hits
TCONS_00018962	Solyc05g044600.1	Unknown Protein	No hits
TCONS_00018977	Solyc05g046300.2	Xyloglucan endotransglucosylase_hydrolase 2 IPR016455 Xyloglucan endotransglucosylase_hydrolase	AT4G25810
TCONS_00017666	Solyc05g046360.2	Tryptophan synthase beta chain 1 IPR001926 Pyridoxal phosphate-dependent enzyme, beta subunit	AT5G54810
TCONS_00018983	Solyc05g047420.2	Unknown Protein	No hits
TCONS_00017685	Solyc05g048810.2	Glycosyltransferase CAZy family GT90 (Fragment) IPR008539 Protein of unknown function DUF821, CAP10-like	AT5G23850
TCONS_00017687	Solyc05g048850.2	Unknown Protein	No hits
TCONS_00019056	Solyc05g051030.2	Dihydroflavonol 4-reductase family-binding domain	AT2G45400
TCONS_00019096	Solyc05g051710.2	Iron--sulfur cluster insertion protein erpA IPR016092 FeS cluster insertion	AT1G10500
TCONS_00019135	Solyc05g052280.2	CBL-interacting protein kinase 13 IPR002290 Serine_threonine protein kinase	AT5G58380
TCONS_00019145	Solyc05g052470.2	Cation-independent mannose-6-phosphate receptor CI-MPR IPR018939 Autophagy-related protein 27	AT2G40316
TCONS_00017849	Solyc05g052510.2	Dehydration-responsive family protein IPR004159 Protein of unknown function DUF248, methyltransferase putative	AT2G40280
TCONS_00017862	Solyc05g052690.2	Hydroxycinnamoyl transferase IPR003480 Transferase	AT2G39980
TCONS_00017877	Solyc05g052920.2	Actin-binding LIM protein 1 IPR001781 Zinc finger, LIM-type	AT2G39830
TCONS_00019189	Solyc05g053070.2	Unknown Protein	No hits
TCONS_00019192	Solyc05g053130.2	Glucosyltransferase IPR002213 UDP-glucuronosyl_UDP-glucosyltransferase	AT3G50740
TCONS_00019218	Solyc05g053440.2	DNA-directed RNA polymerase subunit IPR001529 DNA-directed RNA polymerase, M_15 kDa subunit	AT3G16980
TCONS_00018053	Solyc05g055090.2	Unknown Protein	No hits
TCONS_00018101	Solyc05g055880.2	F-box protein PP2-B1	AT2G02240
TCONS_00019429	Solyc05g056290.2	RNA-binding protein Luc7-like 2 IPR004882 LUC7 related	AT3G03340
TCONS_00018146	Solyc05g056460.2	Aspartic proteinase nepenthesin I IPR001461 Peptidase A1	AT2G03200
TCONS_00021164	Solyc06g005110.2	Phosphatidylinositol transfer protein expressed IPR001666 Phosphatidylinositol transfer protein	No hits
TCONS_00019471	Solyc06g005200.2	CCR4-NOT transcription complex subunit 4 IPR003954 RNA recognition, region 1	AT3G45630
TCONS_00021203	Solyc06g005670.2	Unknown Protein	AT3G53320
TCONS_00019502	Solyc06g005790.2	Non-specific lipid-transfer protein IPR013770 Plant lipid transfer protein and hydrophobic protein, helical	AT5G01870
TCONS_00019527	Solyc06g007210.2	Methionine aminopeptidase IPR004545 Proliferation-associated protein 1	AT3G51800
TCONS_00019527	Solyc06g007210.2	Methionine aminopeptidase IPR004545 Proliferation-associated protein 1	AT3G51800
TCONS_00019528	Solyc06g007220.2	Unknown Protein IPR007836 Ribosomal protein L41	AT3G56020
TCONS_00019528	Solyc06g007220.2	Unknown Protein IPR007836 Ribosomal protein L41	AT3G56020
TCONS_00019531	Solyc06g007250.2	BCL-2 binding anthanogene-1 IPR003103 Apoptosis regulator Bcl-2 protein, BAG	AT3G51780
TCONS_00021245	Solyc06g007350.2	Gamma-interferon-inducible lysosomal thiol reductase IPR004911 Gamma interferon inducible lysosomal thiol reductase GILT	AT1G07080
TCONS_00019543	Solyc06g007540.2	B3 domain-containing protein Os05g0481400 IPR003340 Transcriptional factor B3	AT5G58280
TCONS_00019550	Solyc06g007620.2	Early tobacco anther 1	AT5G48480
TCONS_00019623	Solyc06g008860.2	Genomic DNA chromosome 5 TAC clone K22G18 IPR013989 Development and cell death domain	AT2G32910
TCONS_00021367	Solyc06g009400.2	Protein phosphatase-2C IPR015655 Protein phosphatase 2C	AT3G62260
TCONS_00019659	Solyc06g009530.2	Pentatricopeptide repeat-containing protein IPR002885 Pentatricopeptide repeat	AT2G31400
TCONS_00019666	Solyc06g009690.1	BRCT domain-containing protein IPR001357 BRCT	AT4G02110
TCONS_00021471	Solyc06g035410.1	Unknown Protein IPR009902 Protein of unknown function DUF1442	AT5G62280
TCONS_00021482	Solyc06g035890.1	Homeobox-leucine zipper protein ROC7	AT4G04890
TCONS_00019786	Solyc06g036070.2	Zinc finger family protein IPR007087 Zinc finger, C2H2-type	AT4G25610
TCONS_00019794	Solyc06g036300.2	Heat shock protein 90 (Fragment) IPR003594 ATP-binding region, ATPase-like IPR001404 Heat shock protein Hsp90	AT5G52640
TCONS_00019809	Solyc06g036790.1	Os01g0708300 protein (Fragment) IPR000620 Protein of unknown function DUF6, transmembrane	AT5G11960
TCONS_00021523	Solyc06g042950.2	Unknown Protein	No hits
TCONS_00019845	Solyc06g048920.2	Cc-nbs-lrr, resistance protein	AT4G27190
TCONS_00019867	Solyc06g050220.2	Major facilitator superfamily MFS_1	AT5G05310
TCONS_00019867	Solyc06g050220.2	Major facilitator superfamily MFS_1	AT5G05310
TCONS_00019867	Solyc06g050220.2	Major facilitator superfamily MFS_1	AT5G05310
TCONS_00021669	Solyc06g052060.2	Heat shock protein IPR013126 Heat shock protein 70	AT5G42020
TCONS_00019979	Solyc06g053260.1	Unknown Protein	No hits
TCONS_00021734	Solyc06g054010.2	Unknown Protein	No hits
TCONS_00021762	Solyc06g054580.2	Glutaredoxin family protein IPR011905 Glutaredoxin-like, plant II	AT5G18600
TCONS_00021792	Solyc06g060090.2	Mitochondrial ATP synthase subunit	AT5G59613
TCONS_00021808	Solyc06g060380.2	Organic anion transporter IPR004853 Protein of unknown function DUF250	AT1G77610
TCONS_00020120	Solyc06g060550.2	Unknown Protein	No hits
TCONS_00020181	Solyc06g062360.2	Holliday junction ATP-dependent DNA helicase ruvB IPR010339 TIP49, C-terminal	AT5G22330
TCONS_00021885	Solyc06g062600.2	Transmembrane 9 superfamily protein member 4	AT3G13772
TCONS_00021894	Solyc06g062760.2	5_apos-nucleotidase surE IPR002828 Survival protein SurE-like phosphatase_nucleotidase	AT1G72880
TCONS_00020227	Solyc06g063060.2	COP1-interacting protein 7 (CIP7)-like	AT3G14172
TCONS_00021937	Solyc06g063320.2	Fiber protein Fb15 (Fragment)	AT4G30010
TCONS_00021989	Solyc06g065370.2	Erythroid differentiation-related factor 1-like protein	AT1G35660
TCONS_00022033	Solyc06g065980.2	Cortical cell-delineating protein IPR013770 Plant lipid transfer protein and hydrophobic protein, helical	AT2G45180
TCONS_00020357	Solyc06g066100.2	AFG1-family ATPase IPR005654 ATPase, AFG1-like	AT2G25530
TCONS_00020369	Solyc06g066320.2	Phosphomevalonate kinase IPR016005 Phosphomevalonate kinase, ERG8	AT1G31910
TCONS_00022094	Solyc06g066860.1	2-oxoglutarate-dependent dioxygenase (Fragment)	AT1G52820
TCONS_00022099	Solyc06g067940.2	Cytochrome P450	AT2G26710
TCONS_00020437	Solyc06g068300.2	Adenylate cyclase IPR008172 Adenylate cyclase	AT2G11890
TCONS_00022154	Solyc06g068710.2	Calcium-binding protein Calnexin IPR001580 Calreticulin_calnexin	AT5G61790
TCONS_00022168	Solyc06g068840.2	Ethylene responsive transcription factor 2b IPR001471 Pathogenesis-related transcriptional factor and ERF, DNA-binding	AT5G61890
TCONS_00022231	Solyc06g069780.2	DNA-directed RNA polymerase	AT5G62440
TCONS_00022240	Solyc06g071010.2	N-succinylglutamate 5-semialdehyde dehydrogenase IPR015590 Aldehyde dehydrogenase	AT5G62530
TCONS_00020622	Solyc06g071910.2	Pentatricopeptide repeat-containing protein IPR002885 Pentatricopeptide repeat	AT1G07590
TCONS_00020656	Solyc06g072580.2	Ubiquitin-conjugating enzyme E2 1 IPR015940 Ubiquitin-associated_translation elongation factor EF1B, N-terminal, eukaryote IPR000608 Ubiquitin-conjugating enzyme, E2	AT5G50870
TCONS_00022360	Solyc06g072820.2	Unknown Protein	AT3G03130
TCONS_00022385	Solyc06g073230.2	Stig1 (Fragment) IPR006969 Stigma-specific protein Stig1	AT1G50720
TCONS_00020715	Solyc06g073460.2	Os11g0282300 protein (Fragment) IPR012881 Protein of unknown function DUF1685	AT2G31560
TCONS_00020778	Solyc06g074210.2	Sex-linked protein 9 (Fragment) IPR017498 Photosystem I PsaO	AT1G08380
TCONS_00020812	Solyc06g074650.2	Chromodomain helicase-DNA-binding protein 3 IPR019787 Zinc finger, PHD-finger	AT5G22760
TCONS_00020814	Solyc06g074680.2	Bifunctional polymyxin resistance arnA protein IPR001509 NAD-dependent epimerase_dehydratase	AT1G08200
TCONS_00022498	Solyc06g074720.2	Hydroxycinnamoyl CoA shikimate_quinate hydroxycinnamoyltransferase-like protein (Fragment) IPR003480 Transferase	AT5G48930
TCONS_00020870	Solyc06g075530.1	Dehydroascorbate reductase 1 (Fragment) IPR010987 Glutathione S-transferase, C-terminal-like	AT1G75270
TCONS_00020870	Solyc06g075530.1	Dehydroascorbate reductase 1 (Fragment) IPR010987 Glutathione S-transferase, C-terminal-like	AT1G75270
TCONS_00022578	Solyc06g076140.2	Unknown Protein	AT5G02390
TCONS_00020913	Solyc06g076260.2	Genomic DNA chromosome 5 BAC clone F2O15	AT5G59400
TCONS_00022590	Solyc06g076350.2	mRNA binding protein Pumilio 2 IPR011989 Armadillo-like helical	AT2G29190
TCONS_00022598	Solyc06g076460.2	Ras-related protein Rab-25 IPR015595 Rab11-related	AT1G07410
TCONS_00022599	Solyc06g076470.2	Transcription elongation factor B polypeptide 1 IPR011333 BTB_POZ fold	AT5G59140
TCONS_00020965	Solyc06g076960.1	Carbohydrate kinase PfkB IPR011611 Carbohydrate_purine kinase	AT5G58730
TCONS_00020980	Solyc06g082140.2	Pyruvate decarboxylase 2 IPR012110 Pyruvate decarboxylase_indolepyruvate decarboxylase	AT4G33070
TCONS_00022646	Solyc06g082220.2	Light-dependent short hypocotyls 1 IPR006936 Protein of unknown function DUF640	AT1G07090
TCONS_00022692	Solyc06g082900.2	S-like RNase (Fragment) IPR001568 Ribonuclease T2	AT2G39780
TCONS_00022730	Solyc06g083270.2	Cyclin family protein IPR015429 Transcription regulator cyclin	AT5G48640
TCONS_00022731	Solyc06g083300.2	Ninja-family protein 2 IPR012463 Protein of unknown function DUF1675	AT3G07250
TCONS_00021084	Solyc06g083540.2	Vesicle-associated membrane protein 7B IPR001388 Synaptobrevin	AT1G04760
TCONS_00022752	Solyc06g083570.2	Genomic DNA chromosome 3 TAC clone K7P8	AT3G24750
TCONS_00022795	Solyc06g084250.2	Ent-copalyl diphosphate synthase (Fragment) IPR001906 Terpene synthase-like	AT4G02780
TCONS_00022806	Solyc06g084410.2	Methyl binding domain protein IPR001739 Methyl-CpG DNA binding	AT3G63030
TCONS_00024286	Solyc07g005310.1	Unknown Protein	No hits
TCONS_00024288	Solyc07g005320.2	Unknown Protein	No hits
TCONS_00022852	Solyc07g005430.2	Unknown Protein	No hits
TCONS_00022878	Solyc07g005710.2	Unknown Protein IPR003604 Zinc finger, U1-type	AT2G24030
TCONS_00024327	Solyc07g005790.2	Eukaryotic translation initiation factor 4 gamma 3 IPR016021 MIF4-like, type 1_2_3	AT5G57870
TCONS_00022909	Solyc07g006150.2	Cytochrome P450	AT3G14690
TCONS_00022914	Solyc07g006230.1	UDP-D-glucuronate 4-epimerase 1-binding domain	AT4G30440
TCONS_00022964	Solyc07g006960.2	UPF0414 transmembrane protein C20orf30 homolog IPR008590 Uncharacterised protein family UPF0414	AT4G29850
TCONS_00024491	Solyc07g008110.2	Genomic DNA chromosome 3 P1 clone MUJ8	AT3G24150
TCONS_00023064	Solyc07g008260.2	SCF E3 ubiquitin ligase complex F-box protein grrA IPR006553 Leucine-rich repeat, cysteine-containing subtype	AT2G25490
TCONS_00023080	Solyc07g008470.2	Histone-lysine N-methyltransferase IPR001214 SET	AT1G76710
TCONS_00024548	Solyc07g008770.2	Tetratricopeptide repeat (TPR)-containing protein-like protein IPR011990 Tetratricopeptide-like helical	AT5G17270
TCONS_00023126	Solyc07g009320.2	Pit1 protein	AT1G19610
TCONS_00024578	Solyc07g009490.2	Retroelement pol polyprotein-like	AT4G23160
TCONS_00024629	Solyc07g017980.1	Thaumatin-like protein IPR001938 Thaumatin, pathogenesis-related	AT2G17860
TCONS_00024651	Solyc07g018400.2	Unknown Protein	No hits
TCONS_00023228	Solyc07g020790.2	Unknown Protein	No hits
TCONS_00023229	Solyc07g020800.2	D-xylose-proton symporter (D-xylose transporter) IPR003663 Sugar_inositol transporter	AT1G67300
TCONS_00023267	Solyc07g025390.2	Unknown Protein	AT1G75150
TCONS_00023274	Solyc07g026630.1	Unknown Protein	No hits
TCONS_00024723	Solyc07g026670.2	Unknown Protein	No hits
TCONS_00023310	Solyc07g037930.1	Homeobox-leucine zipper protein ROC7	AT1G73360
TCONS_00024773	Solyc07g039360.1	Unknown Protein	No hits
TCONS_00023354	Solyc07g041020.2	Genomic DNA chromosome 5 P1 clone MHM17	AT4G26060
TCONS_00023361	Solyc07g041200.2	PHD finger family protein IPR019787 Zinc finger, PHD-finger	AT5G20510
TCONS_00024833	Solyc07g041840.1	MTD1	AT5G21940
TCONS_00024875	Solyc07g042530.1	Sucrose synthase 4 IPR012820 Sucrose synthase, plants and cyanobacteria IPR000368 Sucrose synthase	AT3G43190
TCONS_00024922	Solyc07g043360.1	Unknown Protein	No hits
TCONS_00024930	Solyc07g043510.2	UDP-glucosyltransferase IPR002213 UDP-glucuronosyl_UDP-glucosyltransferase	AT5G49690
TCONS_00023476	Solyc07g044760.2	ATPase BadF_BadG_BcrA_BcrD-type family IPR002731 ATPase, BadF_BadG_BcrA_BcrD type	AT1G30540
TCONS_00024942	Solyc07g044770.1	ATP-dependent RNA helicase IPR011545 DNA_RNA helicase, DEAD_DEAH box type, N-terminal	AT3G22310
TCONS_00023479	Solyc07g044810.2	Nbs-lrr, resistance protein	AT1G61300
TCONS_00024976	Solyc07g045240.2	Hydroxyproline-rich glycoprotein family protein-like IPR009719 Protein of unknown function DUF1296	AT3G07660
TCONS_00023535	Solyc07g047750.2	Peroxidase IPR002016 Haem peroxidase, plant_fungal_bacterial	AT1G05260
TCONS_00025033	Solyc07g048040.1	Heterogeneous nuclear ribonucleoprotein A3 IPR000504 RNA recognition motif, RNP-1	AT3G07810
TCONS_00023618	Solyc07g052210.2	Pre-mRNA-splicing factor syf2 IPR013260 mRNA splicing factor SYF2	AT2G16860
TCONS_00023618	Solyc07g052210.2	Pre-mRNA-splicing factor syf2 IPR013260 mRNA splicing factor SYF2	AT2G16860
TCONS_00025094	Solyc07g052220.1	Unknown Protein	No hits
TCONS_00023623	Solyc07g052250.2	Laccase-22 IPR001117 Multicopper oxidase, type 1	AT1G76160
TCONS_00023625	Solyc07g052310.1	Myb-related transcription factor IPR015495 Myb transcription factor	AT2G32460
TCONS_00023625	Solyc07g052310.1	Myb-related transcription factor IPR015495 Myb transcription factor	AT2G32460
TCONS_00023702	Solyc07g053430.2	Ring H2 finger protein IPR018957 Zinc finger, C3HC4 RING-type	AT2G42360
TCONS_00023718	Solyc07g053610.2	Receptor like kinase, RLK	AT1G28440
TCONS_00025177	Solyc07g053620.2	Homeobox protein IPR018500 DDT subgroup	AT5G44180
TCONS_00025184	Solyc07g053670.2	WD repeat protein IPR020472 G-protein beta WD-40 repeat, region	AT4G28450
TCONS_00023736	Solyc07g053840.1	Mitochondrial ADP_ATP carrier proteins IPR002113 Adenine nucleotide translocator 1	AT4G28390
TCONS_00023775	Solyc07g054500.2	Secretory carrier membrane protein IPR007273 SCAMP	AT1G61250
TCONS_00025246	Solyc07g054750.1	Membrane associated protein-like protein IPR008962 PapD-like	AT4G21450
TCONS_00025259	Solyc07g055020.2	Metal ion binding protein IPR006121 Heavy metal transport_detoxification protein	AT1G06330
TCONS_00023850	Solyc07g055860.2	3-demethylubiquinone-9 3-methyltransferase IPR010233 Ubiquinone biosynthesis O-methyltransferase	AT2G30920
TCONS_00023925	Solyc07g061810.1	Heme-binding protein 2 IPR006917 SOUL haem-binding protein	AT1G17100
TCONS_00025379	Solyc07g061970.2	Hydroxyacylglutathione hydrolase IPR001279 Beta-lactamase-like	AT1G53580
TCONS_00025402	Solyc07g062270.2	BES1_BZR1 homolog protein 4 IPR008540 BZR1, transcriptional repressor	AT1G78700
TCONS_00023958	Solyc07g062410.2	Multiprotein bridging factor 1c IPR001387 Helix-turn-helix type 3	AT3G58680
TCONS_00023968	Solyc07g062590.2	DnaJ homolog subfamily C member 7 IPR015609 Molecular chaperone, heat shock protein, Hsp40, DnaJ	AT1G53300
TCONS_00025578	Solyc07g064830.2	Protein serine_threonine kinase IPR002290 Serine_threonine protein kinase	AT5G55090
TCONS_00025589	Solyc07g064950.2	Thioredoxin family protein IPR013766 Thioredoxin domain	AT4G37200
TCONS_00025624	Solyc07g065490.2	Unknown Protein	AT5G55640
TCONS_00025633	Solyc07g065640.2	Ubiquitin-protein ligase 1 IPR000569 HECT	AT1G55860
TCONS_00025816	Solyc08g006650.2	Processive diacylglycerol glucosyltransferase IPR009695 Monogalactosyldiacylglycerol synthase	AT4G31780
TCONS_00025818	Solyc08g006670.2	Conserved oligomeric Golgi complex subunit 2 IPR009316 COG complex component, COG2	AT4G24840
TCONS_00027267	Solyc08g007080.2	Unknown Protein	No hits
TCONS_00027271	Solyc08g007110.2	HAD-superfamily hydrolase subfamily IA variant 3 IPR005834 Haloacid dehalogenase-like hydrolase	AT2G38740
TCONS_00027295	Solyc08g007510.2	Pentatricopeptide repeat-containing protein	AT4G22758
TCONS_00025899	Solyc08g007590.2	Uncharacterized conserved membrane protein IPR019634 Protein of unknown function DUF2499	AT4G22830
TCONS_00025929	Solyc08g008150.1	Unknown Protein	No hits
TCONS_00025930	Solyc08g008160.2	Plant cell wall protein SlTFR88	AT2G46150
TCONS_00025933	Solyc08g008210.2	Cation_H(+) antiporter 18 IPR006153 Cation_H+ exchanger	AT4G23700
TCONS_00027341	Solyc08g008330.2	Inner membrane protein oxaA IPR001708 Membrane insertion protein, OxaA_YidC	AT5G62050
TCONS_00027343	Solyc08g008350.2	Nucleoside diphosphate kinase IPR001564 Nucleoside diphosphate kinase, core	AT4G23900
TCONS_00025985	Solyc08g014020.2	Unknown Protein	AT5G67550
TCONS_00027387	Solyc08g014080.2	Unknown Protein	No hits
TCONS_00026031	Solyc08g016380.1	Protein binding protein	AT1G03365
TCONS_00026035	Solyc08g016440.2	Unknown Protein	No hits
TCONS_00026037	Solyc08g016520.1	Proteasome subunit alpha type IPR001353 Proteasome, subunit alpha_beta	AT3G14290
TCONS_00026037	Solyc08g016520.1	Proteasome subunit alpha type IPR001353 Proteasome, subunit alpha_beta	AT3G14290
TCONS_00027450	Solyc08g016550.2	Ulp1 protease family C-terminal catalytic domain containing protein IPR003653 Peptidase C48, SUMO_Sentrin_Ubl1	No hits
TCONS_00027450	Solyc08g016550.2	Ulp1 protease family C-terminal catalytic domain containing protein IPR003653 Peptidase C48, SUMO_Sentrin_Ubl1	No hits
TCONS_00026141	Solyc08g029360.2	Unknown Protein	No hits
TCONS_00027469	Solyc08g036430.1	Unknown Protein	No hits
TCONS_00027465	Solyc08g036560.2	Unknown Protein	No hits
TCONS_00026079	Solyc08g045780.2	CK25	AT1G61170
TCONS_00026077	Solyc08g048190.1	Unknown Protein	No hits
TCONS_00027605	Solyc08g061260.2	ATP binding _ serine-threonine kinase IPR002290 Serine_threonine protein kinase	AT2G05940
TCONS_00026232	Solyc08g062870.1	Mitochondrial carrier protein-like IPR002113 Adenine nucleotide translocator 1	AT1G14560
TCONS_00026311	Solyc08g066540.2	Acid phosphatase-like protein IPR010028 Acid phosphatase, plant	AT4G29260
TCONS_00027750	Solyc08g066700.2	Exostosin family protein IPR004263 Exostosin-like	AT5G25820
TCONS_00026327	Solyc08g066750.2	CT099 (Fragment) IPR003245 Plastocyanin-like	AT1G64640
TCONS_00027764	Solyc08g066980.2	UDP-N-acetylglucosamine_UDP-glucose_GDP-mannose transporter	AT4G32272
TCONS_00026344	Solyc08g067040.2	Os01g0611000 protein (Fragment) IPR006946 Protein of unknown function DUF642	AT5G11420
TCONS_00027770	Solyc08g067060.1	Arginine N-methyltransferase family protein IPR010456 Ribosomal L11 methyltransferase	AT1G04870
TCONS_00027792	Solyc08g067390.2	Lrr, resistance protein fragment	No hits
TCONS_00026407	Solyc08g068010.1	Potassium_sodium hyperpolarization-activated cyclic nucleotide-gated channel 2 IPR000595 Cyclic nucleotide-binding	AT4G32650
TCONS_00027881	Solyc08g069080.2	Serine_threonine-protein kinase 3 IPR002290 Serine_threonine protein kinase	AT5G67080
TCONS_00027883	Solyc08g069120.2	Dtdp-glucose 4 6-dehydratase-binding domain	AT1G78570
TCONS_00026489	Solyc08g074560.2	Threonyl-tRNA synthetase IPR002320 Threonyl-tRNA synthetase, class IIa	AT5G26830
TCONS_00027916	Solyc08g074650.2	Polyphenol oxidase IPR002227 Tyrosinase	No hits
TCONS_00026517	Solyc08g075000.2	Pectinacetylesterase (Fragment) IPR004963 Pectinacetylesterase	AT4G19420
TCONS_00026530	Solyc08g075190.1	Acyltransferase IPR003480 Transferase	AT3G26040
TCONS_00026536	Solyc08g075370.2	Zinc import ATP-binding protein ZnuC IPR013283 ABC transporter, ABCE	AT4G19210
TCONS_00026567	Solyc08g075730.2	30S ribosomal protein S11 IPR001971 Ribosomal protein S11	AT1G31817
TCONS_00026659	Solyc08g076900.2	Unknown Protein	No hits
TCONS_00026659	Solyc08g076900.2	Unknown Protein	No hits
TCONS_00026659	Solyc08g076900.2	Unknown Protein	No hits
TCONS_00026711	Solyc08g077530.2	Centromere protein O IPR018464 Centromere protein Cenp-O	AT5G10710
TCONS_00028150	Solyc08g077710.2	Eukaryotic translation initiation factor 4 gamma 1 IPR016021 MIF4-like, type 1_2_3	AT3G60240
TCONS_00028203	Solyc08g078480.2	FHA domain containing protein expressed IPR000253 Forkhead-associated	AT4G14490
TCONS_00026790	Solyc08g078630.2	3_apos-5_apos exonuclease IPR002562 3-5 exonuclease	AT3G12410
TCONS_00028218	Solyc08g078690.2	SEC14 cytosolic factor family protein IPR001251 Cellular retinaldehyde-binding_triple function, C-terminal	AT5G47510
TCONS_00028281	Solyc08g079680.2	SNARE associated Golgi protein IPR015414 SNARE associated Golgi protein	AT1G12450
TCONS_00028345	Solyc08g080680.2	Osmotin-like protein (Fragment) IPR001938 Thaumatin, pathogenesis-related	AT4G11650
TCONS_00028370	Solyc08g081130.2	Kinesin-like protein 73641-79546	AT1G63640
TCONS_00028386	Solyc08g081280.2	Ubiquitin-conjugating enzyme IPR015581 Ubiquitin-conjugating enzyme	AT1G63800
TCONS_00028409	Solyc08g081580.2	2-C-methyl-D-erythritol 2 4-cyclodiphosphate synthase IPR003526 2-C-methyl-D-erythritol 2,4-cyclodiphosphate synthase, core	AT1G63970
TCONS_00028467	Solyc08g082390.2	Unknown Protein	No hits
TCONS_00028563	Solyc09g005310.2	mRNA cap guanine-N7 methyltransferase-methyltransferase	AT3G20650
TCONS_00029964	Solyc09g005340.2	Symplekin IPR016024 Armadillo-type fold	AT5G01400
TCONS_00028605	Solyc09g007090.2	Serine_threonine protein phosphatase 2C IPR015655 Protein phosphatase 2C	AT3G12620
TCONS_00028666	Solyc09g007770.2	Aquaporin 2 IPR012269 Aquaporin	AT3G53420
TCONS_00030067	Solyc09g008020.2	ATP binding _ serine-threonine kinase IPR002290 Serine_threonine protein kinase	AT3G09830
TCONS_00028698	Solyc09g008190.2	Unknown Protein	No hits
TCONS_00030156	Solyc09g009380.2	Vacuolar protein sorting-associated protein IPR009291 Protein of unknown function DUF946, plant	AT1G48090
TCONS_00028800	Solyc09g009830.2	Glutathione S-transferase domain protein IPR004045 Glutathione S-transferase, N-terminal	AT5G03880
TCONS_00030185	Solyc09g009840.1	Carbonic anhydrase (Carbonate dehydratase) IPR018340 Carbonic anhydrase, CAH1-like	AT3G52720
TCONS_00030215	Solyc09g010240.1	Auxin response factor 24 IPR003340 Transcriptional factor B3	AT2G36080
TCONS_00028928	Solyc09g011760.2	Receptor-like protein kinase At5g59670 IPR002290 Serine_threonine protein kinase	AT5G59010
TCONS_00030388	Solyc09g014980.2	Alpha-hydroxynitrile lyase IPR000073 Alpha_beta hydrolase fold-1	AT2G23610
TCONS_00028999	Solyc09g015340.1	30S ribosomal protein S4, chloroplastic (Fragment) IPR002942 RNA-binding S4	ATCG00380
TCONS_00030411	Solyc09g015650.2	Unknown Protein	No hits
TCONS_00030415	Solyc09g015700.2	Unknown Protein	No hits
TCONS_00029014	Solyc09g015710.1	Unknown Protein	No hits
TCONS_00029024	Solyc09g016950.2	Unknown Protein	AT2G38580
TCONS_00029033	Solyc09g018190.1	Unknown Protein	No hits
TCONS_00029033	Solyc09g018190.1	Unknown Protein	No hits
TCONS_00030466	Solyc09g020110.2	Unknown Protein	No hits
TCONS_00030521	Solyc09g030360.1	NAC domain protein IPR003441 protein	AT4G28530
TCONS_00030515	Solyc09g030420.2	Unknown Protein	No hits
TCONS_00030490	Solyc09g031850.1	Ycf2 IPR008543 Chloroplast Ycf2	ATCG01280
TCONS_00030485	Solyc09g031960.1	Villin IPR007122 Gelsolin	AT3G57410
TCONS_00029119	Solyc09g055170.1	Unknown Protein	No hits
TCONS_00029119	Solyc09g055170.1	Unknown Protein	No hits
TCONS_00030563	Solyc09g056010.1	Unknown Protein	No hits
TCONS_00030568	Solyc09g056170.2	Genomic DNA chromosome 5 P1 clone MJE7	AT5G48470
TCONS_00030614	Solyc09g059300.1	Unknown Protein	No hits
TCONS_00030615	Solyc09g059310.2	Unknown Protein	No hits
TCONS_00030620	Solyc09g059450.2	CDC45 (Cell division cycle 45)-like protein IPR003874 CDC45-like protein	AT3G25100
TCONS_00029208	Solyc09g059540.1	Unknown Protein	No hits
TCONS_00029208	Solyc09g059540.1	Unknown Protein	No hits
TCONS_00029213	Solyc09g059620.2	Unknown Protein IPR010800 Glycine rich	No hits
TCONS_00030683	Solyc09g063070.2	GDSL esterase_lipase At4g28780 IPR001087 Lipase, GDSL	AT5G33370
TCONS_00029274	Solyc09g064530.2	Receptor like kinase, RLK	AT4G28650
TCONS_00030713	Solyc09g064850.2	Hepatoma-derived growth factor-related protein 3 IPR006569 Regulation of nuclear pre-mRNA protein	AT3G63070
TCONS_00029295	Solyc09g064890.2	ARGONAUTE 1	AT1G48410
TCONS_00029302	Solyc09g065120.2	Unknown Protein	AT1G03180
TCONS_00030729	Solyc09g065130.2	Preprotein translocase secY subunit IPR002208 SecY protein	AT2G31530
TCONS_00030767	Solyc09g065630.2	Chlorophyllase 1 IPR010821 Chlorophyllase	AT5G43860
TCONS_00030807	Solyc09g066120.2	Unknown Protein	No hits
TCONS_00030867	Solyc09g074080.1	Unknown Protein	No hits
TCONS_00029443	Solyc09g074320.2	Oxidoreductase aldo_keto reductase family protein expressed IPR001395 Aldo_keto reductase	AT1G04420
TCONS_00029494	Solyc09g075010.2	WD repeat protein IPR017986 WD40 repeat, region	AT2G47790
TCONS_00029560	Solyc09g076010.2	Serine_threonine protein kinase IPR002290 Serine_threonine protein kinase	AT3G04910
TCONS_00030992	Solyc09g076020.2	PHD finger family protein IPR019787 Zinc finger, PHD-finger	AT4G14920
TCONS_00031023	Solyc09g082540.2	LRR receptor-like serine_threonine-protein kinase, RLP	AT3G22800
TCONS_00031045	Solyc09g082940.2	Unknown Protein	No hits
TCONS_00031079	Solyc09g083260.2	AT5g02940_F9G14_250 (Fragment) IPR010420 Protein of unknown function DUF1012	AT5G43745
TCONS_00029669	Solyc09g089630.2	AT-hook DNA-binding protein (Fragment) IPR014476 Predicted AT-hook DNA-binding	AT4G14465
TCONS_00031117	Solyc09g089670.2	Actin-related protein 8 IPR004000 Actin_actin-like	AT5G43500
TCONS_00029724	Solyc09g090530.2	Heterogeneous nuclear ribonucleoprotein A3 IPR012677 Nucleotide-binding, alpha-beta plait	AT2G33410
TCONS_00031181	Solyc09g090820.2	Euchromatic histone lysine N-methyltransferase 2 IPR003105 SRA-YDG	AT4G13460
TCONS_00031188	Solyc09g090930.2	C2 domain-containing protein IPR018029 C2 membrane targeting protein	AT2G33320
TCONS_00031198	Solyc09g091020.2	Unknown Protein	AT3G04310
TCONS_00031229	Solyc09g091590.2	Uncharacterized aarF domain-containing protein kinase 1 IPR004147 ABC-1	AT3G24190
TCONS_00031291	Solyc09g092720.2	Glycine rich protein IPR010800 Glycine rich	No hits
TCONS_00031292	Solyc09g092740.2	Unknown Protein	No hits
TCONS_00031293	Solyc09g092760.2	Unknown Protein IPR010800 Glycine rich	No hits
TCONS_00031295	Solyc09g097770.2	Glycine rich protein IPR010800 Glycine rich	No hits
TCONS_00031296	Solyc09g097780.2	Cell wall protein IPR010800 Glycine rich	No hits
TCONS_00029871	Solyc09g097870.2	Kinesin-like protein IPR010544 Kinesin-related	AT3G23670
TCONS_00029909	Solyc09g098300.2	Receptor like kinase, RLK	AT3G28040
TCONS_00029910	Solyc09g098310.2	Unknown Protein	AT2G41420
TCONS_00029910	Solyc09g098310.2	Unknown Protein	AT2G41420
TCONS_00029912	Solyc09g098340.2	WD-repeat protein-like IPR017986 WD40 repeat, region	AT5G56190
TCONS_00031370	Solyc10g005260.2	Genomic DNA chromosome 5 P1 clone MXC20	AT4G21895
TCONS_00032657	Solyc10g005660.2	Peroxisomal targeting signal 1 receptor IPR011990 Tetratricopeptide-like helical	AT5G56290
TCONS_00032661	Solyc10g005700.2	Chloride channel E IPR001807 Chloride channel, voltage gated	AT1G55620
TCONS_00032686	Solyc10g006060.2	Heterogeneous nuclear ribonucleoprotein A3 IPR000504 RNA recognition motif, RNP-1	AT3G07810
TCONS_00031533	Solyc10g007700.2	Chlorophyll a-b binding protein 8, chloroplastic IPR001344 Chlorophyll A-B binding protein	AT1G61520
TCONS_00032802	Solyc10g007730.2	Conserved oligomeric Golgi complex subunit 5 IPR019465 Conserved oligomeric Golgi complex, subunit 5	AT1G67930
TCONS_00032841	Solyc10g008220.2	Os07g0507200 protein (Fragment) IPR009675 Targeting for Xklp2	AT1G03780
TCONS_00032852	Solyc10g008350.2	Os05g0169400 protein (Fragment) IPR010820 Protein of unknown function DUF1421	AT4G28300
TCONS_00031581	Solyc10g008370.2	GPI-anchored protein	AT2G20700
TCONS_00031597	Solyc10g008620.2	Unknown Protein	No hits
TCONS_00031608	Solyc10g008730.2	GDSL esterase_lipase At1g28580 IPR001087 Lipase, GDSL	AT1G28580
TCONS_00031613	Solyc10g008800.2	Calmodulin binding protein IPR000048 IQ calmodulin-binding region	AT2G33990
TCONS_00031628	Solyc10g009040.2	Sphingolipid delta 4 desaturase IPR011388 Sphingolipid delta4-desaturase IPR006025 Peptidase M, neutral zinc metallopeptidases, zinc-binding site	AT4G04930
TCONS_00032909	Solyc10g009220.2	Calmodulin-binding protein (Fragment) IPR012416 Calmodulin binding protein-like	AT2G18750
TCONS_00032966	Solyc10g017540.2	ATP-dependent RNA Helicase IPR011545 DNA_RNA helicase, DEAD_DEAH box type, N-terminal	AT4G00660
TCONS_00031700	Solyc10g017840.1	Serine_threonine-protein kinase 24 IPR002290 Serine_threonine protein kinase	AT4G14480
TCONS_00031708	Solyc10g018010.1	Homeodomain-containing transcription factor FWA IPR002913 Lipid-binding START	AT3G03260
TCONS_00031708	Solyc10g018010.1	Homeodomain-containing transcription factor FWA IPR002913 Lipid-binding START	AT3G03260
TCONS_00032984	Solyc10g018250.1	Unknown Protein	No hits
TCONS_00031730	Solyc10g018860.1	Dienelactone hydrolase family protein IPR002925 Dienelactone hydrolase	AT3G23600
TCONS_00031791	Solyc10g044720.1	TPR repeat IPR011990 Tetratricopeptide-like helical	AT3G05625
TCONS_00031828	Solyc10g047000.1	Unknown Protein	No hits
TCONS_00033107	Solyc10g047150.1	Receptor like kinase, RLK	AT4G33430
TCONS_00031839	Solyc10g047250.1	Annexin IPR009118 Annexin, type plant	AT5G12380
TCONS_00031839	Solyc10g047250.1	Annexin IPR009118 Annexin, type plant	AT5G12380
TCONS_00031850	Solyc10g047360.1	Lysine-specific histone demethylase 1 IPR007526 SWIRM	AT1G62830
TCONS_00031853	Solyc10g047410.1	NADH-quinone oxidoreductase subunit D IPR001135 NADH-quinone oxidoreductase, subunit D	ATCG01110
TCONS_00031853	Solyc10g047410.1	NADH-quinone oxidoreductase subunit D IPR001135 NADH-quinone oxidoreductase, subunit D	ATCG01110
TCONS_00031872	Solyc10g049360.1	DNAJ heat shock N-terminal domain-containing protein	AT5G53150
TCONS_00031909	Solyc10g050680.1	Unknown Protein	No hits
TCONS_00031909	Solyc10g050680.1	Unknown Protein	No hits
TCONS_00031916	Solyc10g050860.1	Galactose-1-phosphate uridylyltransferase IPR001937 Galactose-1-phosphate uridyl transferase, class I	AT5G18200
TCONS_00033189	Solyc10g050910.1	MADS-box transcription factor-like protein IPR002100 Transcription factor, MADS-box	AT3G04100
TCONS_00033193	Solyc10g050930.1	Unknown Protein	No hits
TCONS_00031975	Solyc10g054870.1	Chromosome 13 contig 1 DNA sequence IPR018849 Nucleolar 27S pre-rRNA processing, Urb2_Npa2	AT4G30150
TCONS_00033261	Solyc10g055620.1	SKP1-like 1 IPR016897 E3 ubiquitin ligase, SCF complex, Skp subunit	AT1G75950
TCONS_00031998	Solyc10g055660.1	Protein phosphatase 2C IPR015655 Protein phosphatase 2C	AT3G51370
TCONS_00031998	Solyc10g055660.1	Protein phosphatase 2C IPR015655 Protein phosphatase 2C	AT3G51370
TCONS_00033381	Solyc10g078160.1	Nascent polypeptide-associated complex alpha subunit-like protein IPR016641 Nascent polypeptide-associated complex, alpha subunit	AT3G12390
TCONS_00032132	Solyc10g078420.1	F-box family protein IPR001810 Cyclin-like F-box	AT2G32560
TCONS_00033440	Solyc10g079070.1	Squalene synthase IPR006449 Farnesyl-diphosphate farnesyltransferase	AT4G34640
TCONS_00033564	Solyc10g080750.1	Smg-7 homolog nonsense mediated mRNA decay factor (C. elegans) (Fragment) IPR019458 Telomerase activating protein Est1	AT5G19400
TCONS_00032293	Solyc10g081020.1	Hydroxyproline-rich glycoprotein-like	AT3G56590
TCONS_00032323	Solyc10g081360.1	BZIP transcription factor IPR011616 bZIP transcription factor, bZIP-1	AT3G56850
TCONS_00033608	Solyc10g081370.1	Tyrosine phosphatase-like protein ptplad1 IPR017447 CS	AT3G03773
TCONS_00032338	Solyc10g081610.1	Rhomboid protease GlpG IPR002610 Peptidase S54, rhomboid	AT3G58460
TCONS_00033664	Solyc10g083210.1	AtIV20-like protein (Fragment) IPR000061 SWAP_Surp	AT4G31200
TCONS_00033669	Solyc10g083280.1	Hydrolase alpha_beta fold family protein IPR000073 Alpha_beta hydrolase fold-1	AT3G52570
TCONS_00033681	Solyc10g083490.1	F-box family protein IPR001810 Cyclin-like F-box	AT1G67190
TCONS_00032419	Solyc10g083910.1	MYB transcription factor IPR015495 Myb transcription factor	AT3G53200
TCONS_00033808	Solyc10g085480.1	Unknown Protein	No hits
TCONS_00032533	Solyc10g085650.1	Beta-fructofuranosidase insoluble isoenzyme 2 IPR001362 Glycoside hydrolase, family 32	AT2G36190
TCONS_00032552	Solyc10g085970.1	Pathogenesis-related protein IPR001283 Allergen V5_Tpx-1 related	AT3G09590
TCONS_00032555	Solyc10g086000.1	Receptor protein kinase-like protein IPR002290 Serine_threonine protein kinase	AT5G02800
TCONS_00032574	Solyc10g086350.1	Kinesin-5 IPR001752 Kinesin, motor region	AT2G37420
TCONS_00033895	Solyc10g086700.1	Phosphatidylcholine:ceramide cholinephosphotransferase 2	AT3G54020
TCONS_00035295	Solyc11g005850.1	Cysteine desulfurase IPR000192 Aminotransferase, class V_Cysteine desulfurase	No hits
TCONS_00035300	Solyc11g005910.1	Guanylate kinase family protein expressed IPR017665 Guanylate kinase, sub-group	AT3G06200
TCONS_00033977	Solyc11g006320.1	GEX1 (Fragment)	AT5G55490
TCONS_00034015	Solyc11g006920.1	Ferredoxin IPR010241 Ferredoxin (2Fe-2S), plant	AT2G27510
TCONS_00034087	Solyc11g007950.1	Poly(RC) binding protein 3 IPR018111 K Homology, type 1, subgroup	AT5G04430
TCONS_00034087	Solyc11g007950.1	Poly(RC) binding protein 3 IPR018111 K Homology, type 1, subgroup	AT5G04430
TCONS_00034087	Solyc11g007950.1	Poly(RC) binding protein 3 IPR018111 K Homology, type 1, subgroup	AT5G04430
TCONS_00034087	Solyc11g007950.1	Poly(RC) binding protein 3 IPR018111 K Homology, type 1, subgroup	AT5G04430
TCONS_00034110	Solyc11g008320.1	Unknown Protein IPR019320 Protein of unknown function NEP	AT2G39170
TCONS_00035466	Solyc11g008510.1	Actin IPR004000 Actin_actin-like	AT3G60830
TCONS_00035472	Solyc11g008590.1	Ariadne-like ubiquitin ligase IPR002867 Zinc finger, C6HC-type	AT1G65430
TCONS_00034138	Solyc11g008770.1	Pentatricopeptide repeat-containing protein IPR002885 Pentatricopeptide repeat	AT4G01570
TCONS_00035523	Solyc11g010270.1	Pentatricopeptide repeat-containing protein IPR002885 Pentatricopeptide repeat	AT1G28690
TCONS_00034185	Solyc11g010390.1	Mate efflux family protein IPR002528 Multi antimicrobial extrusion protein MatE	AT5G65380
TCONS_00035659	Solyc11g012300.1	SWIB_MDM2 domain containing protein IPR019835 SWIB domain	AT4G22360
TCONS_00035660	Solyc11g012320.1	Unknown Protein	AT4G22370
TCONS_00034314	Solyc11g012470.1	Ras-related protein Rab-25 IPR015595 Rab11-related	AT5G47520
TCONS_00035692	Solyc11g012830.1	Replication factor C subunit 2 IPR013748 Replication factor C	AT1G21690
TCONS_00035711	Solyc11g013100.1	Monofunctional biosynthetic peptidoglycan transglycosylase IPR001264 Glycosyl transferase, family 51	AT5G35370
TCONS_00034368	Solyc11g013130.1	Protein crcB homolog IPR003691 Camphor resistance CrcB protein	AT2G41705
TCONS_00034368	Solyc11g013130.1	Protein crcB homolog IPR003691 Camphor resistance CrcB protein	AT2G41705
TCONS_00034368	Solyc11g013130.1	Protein crcB homolog IPR003691 Camphor resistance CrcB protein	AT2G41705
TCONS_00035732	Solyc11g013440.1	Chromatin structure-remodeling complex protein BSH	AT3G17590
TCONS_00035743	Solyc11g013770.1	Unknown Protein	AT1G36990
TCONS_00034472	Solyc11g020210.1	Nuclear pore complex protein-related protein (Fragment)	AT5G05680
TCONS_00034472	Solyc11g020210.1	Nuclear pore complex protein-related protein (Fragment)	AT5G05680
TCONS_00034478	Solyc11g020300.1	Histone-binding protein RBBP7 IPR011046 WD40 repeat-like	AT5G58230
TCONS_00035831	Solyc11g020890.1	Ulp1 protease family C-terminal catalytic domain containing protein IPR003653 Peptidase C48, SUMO_Sentrin_Ubl1	No hits
TCONS_00034496	Solyc11g020920.1	Unknown Protein	AT4G27510
TCONS_00034496	Solyc11g020920.1	Unknown Protein	AT4G27510
TCONS_00034504	Solyc11g021200.1	NADH dehydrogenase subunit 5 (Fragment) IPR003916 NADH:ubiquinone oxidoreductase, chain 5	ATCG01010
TCONS_00034504	Solyc11g021200.1	NADH dehydrogenase subunit 5 (Fragment) IPR003916 NADH:ubiquinone oxidoreductase, chain 5	ATCG01010
TCONS_00034517	Solyc11g022540.1	Transmembrane protein 205	AT1G22600
TCONS_00036085	Solyc11g040050.1	Phototropic-responsive NPH3 family protein IPR004249 NPH3	AT3G19850
TCONS_00034711	Solyc11g042620.1	Ribosomal protein S5 IPR005716 Ribosomal protein S7, eukaryotic_archaeal	AT2G37270
TCONS_00036040	Solyc11g044320.1	Proline iminopeptidase IPR005944 Peptidase S33, proline iminopeptidase 1	AT2G14260
TCONS_00036133	Solyc11g062280.1	Signal recognition particle protein (SRP72) IPR013699 Signal recognition particle, SRP72 subunit, RNA-binding	AT1G67680
TCONS_00036154	Solyc11g064850.1	C2 domain-containing protein IPR000008 C2 calcium-dependent membrane targeting	AT5G12300
TCONS_00034816	Solyc11g065100.1	DUF803 domain membrane protein IPR008521 Protein of unknown function DUF803	AT1G34470
TCONS_00034833	Solyc11g065380.1	Set1_Ash2 histone methyltransferase complex subunit ASH2 IPR018355 SPla_RYanodine receptor subgroup	AT1G51450
TCONS_00034906	Solyc11g066650.1	Hydroxycinnamoyl CoA shikimate_quinate hydroxycinnamoyltransferase-like protein (Fragment) IPR003480 Transferase	AT5G48930
TCONS_00036260	Solyc11g066770.1	AP-2 complex subunit alpha IPR011989 Armadillo-like helical	AT5G22770
TCONS_00034919	Solyc11g066830.1	Cellulose synthase-like C6 glycosyltransferase family 2 IPR001173 Glycosyl transferase, family 2	AT5G22740
TCONS_00034950	Solyc11g068400.1	Unknown Protein	AT3G52740
TCONS_00036302	Solyc11g068440.1	Ferredoxin IPR010241 Ferredoxin (2Fe-2S), plant	AT2G27510
TCONS_00036314	Solyc11g068610.1	Germin-like protein 1 IPR014710 RmlC-like jelly roll fold	AT1G02335
TCONS_00034973	Solyc11g068670.1	OTU domain containing protein IPR003323 Ovarian tumour, otubain	AT2G27350
TCONS_00036357	Solyc11g069110.1	ARGONAUTE 1 IPR003165 Stem cell self-renewal protein Piwi	AT1G48410
TCONS_00036374	Solyc11g069360.1	Zinc finger family protein IPR011016 Zinc finger, RING-CH-type	AT5G60580
TCONS_00036414	Solyc11g069860.1	Telomere repeat-binding protein 4 IPR001005 SANT, DNA-binding	AT2G37025
TCONS_00036415	Solyc11g069910.1	Unknown Protein	No hits
TCONS_00036464	Solyc11g071700.1	Cellular nucleic acid binding protein IPR013084 Zinc finger, CCHC retroviral-type	AT3G43590
TCONS_00036466	Solyc11g071710.1	Ubiquitin carboxyl-terminal hydrolase family protein expressed IPR001394 Peptidase C19, ubiquitin carboxyl-terminal hydrolase 2	AT5G06600
TCONS_00036618	Solyc12g005570.1	Unknown Protein	No hits
TCONS_00036630	Solyc12g005770.1	Genomic DNA chromosome 3 P1 clone MSD21	AT3G21865
TCONS_00037947	Solyc12g007000.1	Arf GTPase activating protein IPR001164 Arf GTPase activating protein	AT4G13350
TCONS_00036737	Solyc12g008560.1	N-acetylated alpha-linked acidic dipeptidase 2 IPR007365 Transferrin receptor-like, dimerisation	AT5G19740
TCONS_00036737	Solyc12g008560.1	N-acetylated alpha-linked acidic dipeptidase 2 IPR007365 Transferrin receptor-like, dimerisation	AT5G19740
TCONS_00036766	Solyc12g008820.1	Unknown Protein	AT4G29660
TCONS_00038006	Solyc12g008910.1	Cytokinin oxidase_dehydrogenase 2 IPR015345 Cytokinin dehydrogenase 1, FAD and cytokinin binding	AT5G56970
TCONS_00036829	Solyc12g009860.1	Unknown Protein	AT3G48675
TCONS_00036832	Solyc12g009920.1	UDP-glucosyltransferase HvUGT5876 IPR002213 UDP-glucuronosyl_UDP-glucosyltransferase	AT2G15490
TCONS_00038091	Solyc12g010150.1	Unknown Protein	No hits
TCONS_00038095	Solyc12g010310.1	Unknown Protein	No hits
TCONS_00038144	Solyc12g011090.1	Vacuolar cation_proton exchanger 2	AT1G55720
TCONS_00036909	Solyc12g011180.1	Phospholipase D IPR011402 Phospholipase D, plant	AT3G15730
TCONS_00038153	Solyc12g011270.1	Myb family transcription factor IPR012287 Homeodomain-related	AT5G06800
TCONS_00038163	Solyc12g011440.1	Hydroxyacylglutathione hydrolase IPR001279 Beta-lactamase-like	AT1G53580
TCONS_00036926	Solyc12g013500.1	Unknown Protein	No hits
TCONS_00038189	Solyc12g013870.1	Proton pump interactor 1	AT4G27500
TCONS_00036984	Solyc12g014220.1	RNA binding protein IPR000504 RNA recognition motif, RNP-1	AT3G15010
TCONS_00037001	Solyc12g014440.1	Cellulose synthase IPR005150 Cellulose synthase	AT4G23990
TCONS_00037013	Solyc12g014600.1	Pirin IPR012093 Pirin	AT1G50590
TCONS_00038260	Solyc12g015740.1	Unknown Protein	AT5G55840
TCONS_00037058	Solyc12g017530.1	Salt tolerance protein II	AT2G44060
TCONS_00037058	Solyc12g017530.1	Salt tolerance protein II	AT2G44060
TCONS_00038294	Solyc12g017830.1	DUF410 domain protein IPR007317 Uncharacterised protein family UPF0363	AT5G63220
TCONS_00038312	Solyc12g019110.1	Valyl-tRNA synthetase IPR002303 Valyl-tRNA synthetase, class Ia	AT5G16715
TCONS_00038347	Solyc12g021230.1	Unknown Protein	No hits
TCONS_00037348	Solyc12g038340.1	Unknown Protein	No hits
TCONS_00037348	Solyc12g038340.1	Unknown Protein	No hits
TCONS_00038537	Solyc12g038630.1	Unknown Protein	No hits
TCONS_00038506	Solyc12g042170.1	Nuclear factor related to kappa-B-binding protein related	AT3G45830
TCONS_00038480	Solyc12g042900.1	Acyl-protein thioesterase 2 IPR003140 Phospholipase_carboxylesterase	AT1G52700
TCONS_00038473	Solyc12g043050.1	Sulfate transporter IPR011547 Sulphate transporter	AT3G15990
TCONS_00037258	Solyc12g043160.1	IST1-like protein IPR005061 Protein of unknown function DUF292, eukaryotic	AT1G79910
TCONS_00037213	Solyc12g044950.1	Short-chain dehydrogenase_reductase SDR IPR002347 Glucose_ribitol dehydrogenase	AT3G55310
TCONS_00038640	Solyc12g056110.1	Ubiquitin-conjugating enzyme E2 8 IPR000608 Ubiquitin-conjugating enzyme, E2	AT5G53300
TCONS_00038723	Solyc12g057110.2	Purine permease family protein IPR004853 Protein of unknown function DUF250	AT1G28220
TCONS_00038727	Solyc12g057160.1	Unknown Protein	No hits
TCONS_00038376	Solyc12g068060.1	RNA polymerase II C-terminal domain phosphatase-like 3 IPR011947 FCP1-like phosphatase, phosphatase domain	AT2G33540
TCONS_00037131	Solyc12g077610.1	Unknown Protein	No hits
TCONS_00037131	Solyc12g077610.1	Unknown Protein	No hits
TCONS_00038742	Solyc12g087960.1	AT-hook motif nuclear localized protein 17 IPR014476 Predicted AT-hook DNA-binding	AT5G49700
TCONS_00037528	Solyc12g088420.1	Unknown Protein IPR001944 Glycoside hydrolase, family 35	AT5G01075
TCONS_00037537	Solyc12g088660.1	Cyclin D IPR015451 Cyclin D	AT5G67260
TCONS_00037647	Solyc12g096330.1	ChaC cation transport regulator-like 1 IPR006840 ChaC-like protein	AT5G26220
TCONS_00037695	Solyc12g098230.1	NB-ARC domain containing protein expressed	AT4G13690
TCONS_00037695	Solyc12g098230.1	NB-ARC domain containing protein expressed	AT4G13690
TCONS_00038951	Solyc12g098390.1	IFA-binding protein IPR007656 Protein of unknown function DUF593	AT4G13630
TCONS_00038983	Solyc12g098950.1	Ubiquitin IPR019956 Ubiquitin subgroup	AT2G47110
TCONS_00037777	Solyc12g099510.1	Unknown Protein	AT3G06890
TCONS_00039053	Solyc12g099940.1	Serine-glyoxylate aminotransferase IPR000192 Aminotransferase, class V_Cysteine desulfurase	AT2G13360
