# Supplementary material for: Genome-wide identification of long non-coding RNAs in tomato plants irradiated by neutrons followed by infection with Tomato yellow leaf curl virus
Source: PeerJ. 2019 Jan 28;7:e6286. doi: 10.7717/peerj.6286 (PMC6354667; doi:10.7717/peerj.6286)
Supplement: Table S4 — Identification ofGO enrichment information of identified lncRNAs. [file peerj-07-6286-s004.xlsx]

## Sheet: Table S4
Table S4. Highly enriched gene ontology (GO) terms for tomato mRNAs associated with lncRNAs.
GOID	Ontology	Term	Level	Number in your list (q)	Number in the genome (m)	Log odd-ratio	p-value
GO:0006094	biological_process	gluconeogenesis	6	9	164	2.093	0.0664
GO:0008152	biological_process	metabolic process	1	155	8834	0.448	0.00282
GO:0019319	biological_process	hexose biosynthetic process	5	9	168	2.059	0.0738
GO:0044238	biological_process	primary metabolic process	1	134	7322	0.509	0.00243
GO:0044281	biological_process	small molecule metabolic process	1	57	2691	0.72	0.0417
GO:0071704	biological_process	organic substance metabolic process	1	147	8237	0.473	0.00243
GO:0006139	biological_process	nucleobase-containing compound metabolic process	6	57	2670	0.731	0.037
GO:0006725	biological_process	cellular aromatic compound metabolic process	2	67	3385	0.622	0.0567
GO:0006807	biological_process	nitrogen compound metabolic process	1	108	6150	0.45	0.06
GO:0009987	biological_process	cellular process	1	170	10742	0.299	0.0958
GO:0044237	biological_process	cellular metabolic process	2	139	7935	0.446	0.0108
GO:0046483	biological_process	heterocycle metabolic process	2	63	3083	0.668	0.0459
GO:1901360	biological_process	organic cyclic compound metabolic process	1	72	3600	0.637	0.0333
GO:0006996	biological_process	organelle organization	2	51	1947	1.026	0.00134
GO:0016043	biological_process	cellular component organization	2	61	2961	0.68	0.0461
GO:0055086	biological_process	nucleobase-containing small molecule metabolic process	6	22	764	1.163	0.0859
GO:0009056	biological_process	catabolic process	1	43	1705	0.972	0.0108
GO:0009057	biological_process	macromolecule catabolic process	2	21	645	1.34	0.0375
GO:0030163	biological_process	protein catabolic process	5	17	469	1.495	0.0443
GO:0044248	biological_process	cellular catabolic process	2	41	1535	1.055	0.00522
GO:0044257	biological_process	cellular protein catabolic process	7	17	462	1.517	0.0395
GO:0044265	biological_process	cellular macromolecule catabolic process	4	21	593	1.462	0.0161
GO:0051603	biological_process	proteolysis involved in cellular protein catabolic process	8	17	434	1.607	0.0236
GO:1901565	biological_process	organonitrogen compound catabolic process	3	22	751	1.188	0.072
GO:1901575	biological_process	organic substance catabolic process	2	39	1426	1.089	0.00522
GO:0010035	biological_process	response to inorganic substance	1	34	1380	0.938	0.0591
GO:0042221	biological_process	response to chemical	1	74	3782	0.606	0.0445
GO:0016070	biological_process	RNA metabolic process	7	35	1473	0.886	0.0808
GO:0009628	biological_process	response to abiotic stimulus	1	60	2812	0.731	0.0265
GO:0022607	biological_process	cellular component assembly	3	24	784	1.251	0.0333
GO:1905393	biological_process	plant organ formation	3	11	229	1.901	0.0522
GO:0009651	biological_process	response to salt stress	2	23	785	1.188	0.0591
GO:0006511	biological_process	ubiquitin-dependent protein catabolic process	9	14	343	1.666	0.0461
GO:0019941	biological_process	modification-dependent protein catabolic process	9	14	349	1.641	0.0514
GO:0043632	biological_process	modification-dependent macromolecule catabolic process	4	14	349	1.641	0.0514
GO:0048584	biological_process	positive regulation of response to stimulus	2	7	103	2.402	0.08
GO:0009787	biological_process	regulation of abscisic acid-activated signaling pathway	4	6	53	3.138	0.0237
GO:0009789	biological_process	positive regulation of abscisic acid-activated signaling pathway	6	6	18	4.696	0.000137
GO:0009967	biological_process	positive regulation of signal transduction	5	6	31	3.912	0.00243
GO:0010647	biological_process	positive regulation of cell communication	2	6	35	3.737	0.00345
GO:0023056	biological_process	positive regulation of signaling	2	6	31	3.912	0.00243
GO:1901419	biological_process	regulation of response to alcohol	1	6	53	3.138	0.0237
GO:1901421	biological_process	positive regulation of response to alcohol	3	6	18	4.696	0.000137
GO:1905957	biological_process	regulation of cellular response to alcohol	2	6	53	3.138	0.0237
GO:1905959	biological_process	positive regulation of cellular response to alcohol	4	6	18	4.696	0.000137
GO:0090333	biological_process	regulation of stomatal closure	1	3	9	4.696	0.0461
GO:0043903	biological_process	regulation of symbiosis, encompassing mutualism through parasitism	1	4	5	5.959	0.000228
GO:0005623	cellular_component	cell	1	318	21711	0.188	0.00243
GO:0044464	cellular_component	cell part	2	318	21711	0.188	0.00243
GO:0005829	cellular_component	cytosol	4	45	2036	0.781	0.0664
GO:0016020	cellular_component	membrane	1	104	5051	0.679	0.000453
GO:0005886	cellular_component	plasma membrane	4	71	3261	0.76	0.00425
GO:0071944	cellular_component	cell periphery	2	76	3735	0.662	0.0158
GO:0005911	cellular_component	cell-cell junction	1	24	854	1.128	0.072
GO:0030054	cellular_component	cell junction	1	24	854	1.128	0.072
GO:0005488	molecular_function	binding	1	120	6577	0.505	0.00904
GO:0097159	molecular_function	organic cyclic compound binding	1	82	3628	0.814	0.000317
GO:1901363	molecular_function	heterocyclic compound binding	1	82	3609	0.821	0.00028
GO:0003777	molecular_function	microtubule motor activity	1	6	66	2.822	0.0522
GO:0008081	molecular_function	phosphoric diester hydrolase activity	1	6	50	3.222	0.0189
GO:0000166	molecular_function	nucleotide binding	2	26	839	1.269	0.0177
GO:0036094	molecular_function	small molecule binding	1	26	874	1.21	0.0286
GO:0043168	molecular_function	anion binding	1	23	751	1.252	0.0417
GO:1901265	molecular_function	nucleoside phosphate binding	2	26	839	1.269	0.0177
GO:0005544	molecular_function	calcium-dependent phospholipid binding	2	3	11	4.407	0.072
GO:0042393	molecular_function	histone binding	1	4	23	3.758	0.0514
GO:0031625	molecular_function	ubiquitin protein ligase binding	1	4	9	5.111	0.00243
GO:0044389	molecular_function	ubiquitin-like protein ligase binding	1	4	9	5.111	0.00243
GO:0004630	molecular_function	phospholipase D activity	2	4	12	4.696	0.00702
